# Supplementary material
Source: ML conference proceedings conference paper supplement (https://proceedings.neurips.cc/paper_files/paper/2023/hash/f188a55392d3a7509b0b27f8d24364bb-Abstract.html)
Supplement: Supplementary file 1 [file f188a55392d3a7509b0b27f8d24364bb-Supplemental-Conference.pdf]

---

# Expanding Small-Scale Datasets with Guided Imagination

---

Yifan Zhang<sup>1\*</sup> Daquan Zhou<sup>2\*</sup> Bryan Hooi<sup>1</sup> Kai Wang<sup>1</sup> Jiashi Feng<sup>2</sup>  
<sup>1</sup>National University of Singapore <sup>2</sup>ByteDance

We organize the supplementary materials as follows:

- Appendix **A**: More related studies.
- Appendix **B**: More preliminary studies.
- Appendix **C**: Theoretical analysis.
- Appendix **D**: More method and implementation details.
- Appendix **E**: Dataset statistics.
- Appendix **F**: More experimental results and discussions.
- Appendix **G**: More visualization results.

## A More Related Studies

**Image synthesis.** Over the past decade, image synthesis [2, 11, 57, 64, 94] has been extensively explored, with four main approaches leading the way: generative adversarial networks (GANs) [15, 30], auto-regressive models [34, 50], diffusion models [14, 28], and neural radiance fields [18, 41, 78]. Recently, diffusion techniques, such as DALL-E2 [49], Imagen [54], and Stable Diffusion [52], have demonstrated exceptional capabilities in producing photo-realistic images. In practice, these techniques can serve as prior models in our GIF framework for dataset expansion. Additionally, CLIP [47], thanks to its text-image matching ability, has been used to guide image generation [33, 42, 45, 66]. In these approaches, CLIP matches a generated image with a given text. In contrast, our work uses CLIP to align the latent features of category-agnostic generative models with the label space of the target dataset. This alignment enables GIF to perform guided data expansion, generating informative new samples specific to target classes.

Furthermore, model inversion [69, 71] is another technique that has been investigated for image generation by inverting a trained classification network [67, 77] or a GAN model [95]. Although we currently apply only two advanced generative models (DALL-E2 and Stable Diffusion) and a reconstruction model (MAE) within the GIF framework in this study, model inversion methods could also be incorporated into our framework for dataset expansion. This opens up exciting avenues for future research.

**More discussion on data augmentation.** Image data augmentation has become a staple in enhancing the generalization of DNNs during model training [61, 76]. Based on technical characteristics, image data augmentation can be categorized into four main types: image manipulation, image erasing, image mix, and auto augmentation.

Image manipulation augments data through image transformations like random flipping, rotation, scaling, cropping, sharpening, and translation [76]. Image erasing, on the other hand, substitutes pixel values in certain image regions with constant or random values, as seen in Cutout [13], Random Erasing [92], GridMask [6], and Fenchmask [37]. Image mix combines two or more images or

---

\*Corresponding to: yifan.zhang@u.nus.edu, zhoudaquan21@gmail.com

sub-regions into a single image, as exemplified by Mixup [84], CutMix [80], and AugMix [25]. Lastly, Auto Augmentation utilizes a search algorithm or random selection to determine augmentation operations from a set of random augmentations, such as AutoAugment [9], Fast AutoAugment [39], and RandAugment [10].

While these methods have shown effectiveness in certain applications, they primarily augment data by applying pre-defined transformations on each image. This results in only local variations in pixel values and does not generate images with significantly diversified content. Furthermore, as most methods employ random operations, they cannot ensure that the augmented samples are informative for model training and may even introduce noisy augmented samples. Consequently, the new information brought about is often insufficient for expanding small datasets, leading to low expansion efficiency. In contrast, our proposed GIF framework utilizes powerful generative models (such as DALL-E2 and Stable Diffusion) trained on large-scale image datasets, guiding them to optimize latent features in accordance with our established criteria (*i.e.*, *class-maintained information boosting* and *sample diversity promotion*). This results in the creation of images that are both more informative and diversified than those from simple image augmentation, thereby leading to more efficient and effective dataset expansion.

We note that the work [72] also explores MAE for image augmentation based on its reconstruction capability. It first masks some sub-regions of images and then feeds the masked images into MAE for reconstruction. The recovered images with slightly different sub-regions are then used as augmented samples. Like other random augmentation methods, this approach only varies pixel values locally and cannot ensure that the reconstructed images are informative and useful. In contrast, our GIF-MAE guides MAE to create informative new samples with diverse styles through our guided latent feature optimization strategy. Therefore, GIF-MAE is capable of generating more useful synthetic samples, effectively expanding the dataset.

**Contrasting with dataset distillation.** Dataset distillation, also known as dataset condensation, is a task that seeks to condense a large dataset into a smaller set of synthetic samples that are comparably effective [4, 60, 68, 74, 89, 90, 91, 93]. The goal of this task is to train models to achieve performance comparable to the original dataset while using significantly fewer resources. Such a task is diametrically opposed to our work on dataset expansion, which strives to *expand a smaller dataset into a larger, richer, and more informative one*. We achieve this by intelligently generating new samples that are both informative and diverse. Hence, dataset distillation focuses on large-data applications, whereas our focus lies on expanding dataset diversity and information richness for more effective deep model training in small-data applications.

**Contrasting with transfer learning.** Numerous studies have focused on model transfer learning techniques using publicly available large datasets like ImageNet [12, 51]. These approaches include model fine-tuning [20, 38, 85], knowledge distillation [19, 27], and domain adaptation [17, 40, 46, 65, 79, 88].

Despite effectiveness in certain applications, these model transfer learning paradigms also suffer from key limitations. For instance, the study [48] found that pre-training and fine-tuning schemes do not significantly enhance model performance when the pre-trained datasets differ substantially from the target datasets, such as when transferring from natural images to medical images. Moreover, model domain adaptation often necessitates that the source dataset and the target dataset share the same or highly similar label spaces, a requirement that is often unmet in small-data application scenarios due to the inaccessibility of a large-scale and labeled source domain with a matching label space. In addition, the work [63] found that knowledge distillation does not necessarily work if the issue of model mismatch exists [7], *i.e.*, large discrepancy between the predictive distributions of the teacher model and the student model. The above limitations of model transfer learning underscore the importance of the dataset expansion paradigm: if a small dataset is successfully expanded, it can be directly used to train various model architectures.

We note that some data-free knowledge distillation studies [5, 77, 82] also synthesize images, but their goal is particularly to enable *knowledge distillation* in the setting without data. In contrast, our task is independent of model knowledge distillation. The expanded datasets are not method-dependent or model-dependent, and, thus, can train various model architectures to perform better than the original small ones.

## B More Preliminary Studies

### B.1 Sample-wise expansion or sample-agnostic expansion?

When we design the selective expansion strategy in Section 3.2, another question appears: should we ensure that each sample is expanded by the same ratio? To determine this, we empirically compare RandAugment expansion with sample-wise selection and sample-agnostic selection according to one expansion criteria, *i.e.*, *class-maintained information boosting*. Figure 1 shows that sample-wise expansion performs much better than sample-agnostic expansion. To find out the reason for this phenomenon, we visualize how many times a sample is expanded by sample-agnostic expansion. As shown in Figure 2, the expansion numbers of different samples by sample-agnostic expansion present a long-tailed distribution [87], with many image samples not expanded at all. The main reason for this is that, due to the randomness of RandAugment and the differences among images, not all created samples are informative and it is easier for some samples to be augmented more frequently than others. Therefore, given a fixed expansion ratio, the sample-agnostic expansion strategy, as it ignores the differences in images, tends to select more expanded samples for more easily augmented images. This property leads sample-agnostic expansion to waste valuable original samples for expansion (*i.e.*, loss of information) and also incurs a class-imbalance problem, thus resulting in worse performance in Figure 1. In contrast, sample-wise expansion can fully take advantage of all the samples in the target dataset and thus is more effective than sample-agnostic expansion, which should be considered when designing dataset expansion approaches.

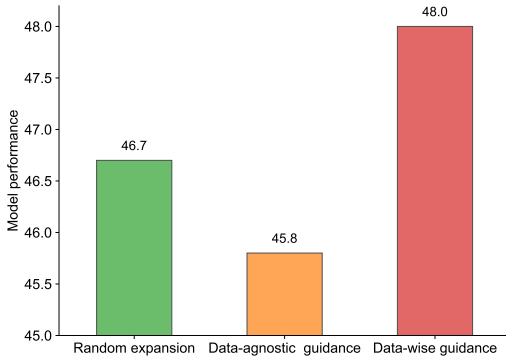

Figure 1: Comparison of model performance between samples-wise selection and sample-agnostic selection for RandAugment expansion on CIFAR100-Subset.

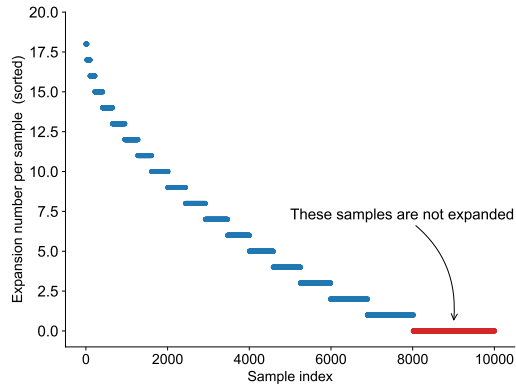

Figure 2: Statistics of the expansion numbers of different data in CIFAR100-Subset by sample-agnostic selective expansion with RandAugment, which presents a long-tailed distribution.

### B.2 Pixel-level noise or channel-level noise?

In our preliminary studies exploring the MAE expansion strategy, we initially used pixel-level noise to modify latent features. However, this approach did not perform well. To understand why, we analyze the reconstructed images. An example of this is presented in Figure 3(d). We find that the generated image based on pixel-level noise variation is analogous to adding pixel-level noise to the original images. This may harm the integrity and smoothness of image content, leading the reconstructed images to be noisy and less informative. In comparison, as shown in Figure 3(b), a more robust augmentation method like RandAugment primarily alters the style and geometric positioning of images but only slightly modifies the content semantics. As a result, it better preserves content consistency. This difference inspires us to factorize the influences on images into two dimensions: image styles and image content. In light of the findings in [29], we know that the channel-level latent features encode more subtle style information, whereas the token-level latent features convey more content information. We thus decouple the latent features of MAE into two dimensions (*i.e.*, a token dimension and a channel dimension), and plot the latent feature distribution change between the generated image and the original image in these two dimensions.

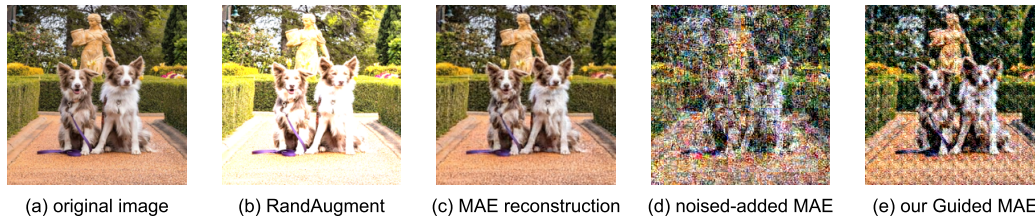

Figure 3: An illustrated visualization of the generated images by (b) RandAugment, (c) MAE reconstruction, (d) random pixel-level variation over latent features, and (e) our guided MAE expansion. We find our guided MAE can generate content-consistent images of diverse styles.

Figure 4 shows the visualization of this latent feature distribution change. The added pixel-level noise changes the token-level latent feature distribution more significantly than RandAugment (cf. Figure 4(a)). However, it only slightly changes the channel-level latent feature distribution (cf. Figure 4(b)). This implies that pixel-level noise mainly alters the content of images but slightly changes their styles, whereas RandAugment mainly influences the style of images while maintaining their content semantics. In light of this observation and the effectiveness of RandAugment, we are motivated to disentangle latent features into the two dimensions, and particularly conduct channel-level noise to optimize the latent features in our method. As shown in Figure 4, the newly explored channel-level noise variation varies the channel-level latent feature more significantly than the token-level latent feature. It thus can diversify the style of images while maintaining the integrity of image content. This innovation enables the explored MAE expansion strategy to generate more informative samples compared to pixel-level noise variation (cf. Figure 3(d) vs. Figure 3(e)), leading to more effective dataset expansion, as shown in Section 5.2. In light of this finding, we also conduct channel-level noise variation for GIF-SD.

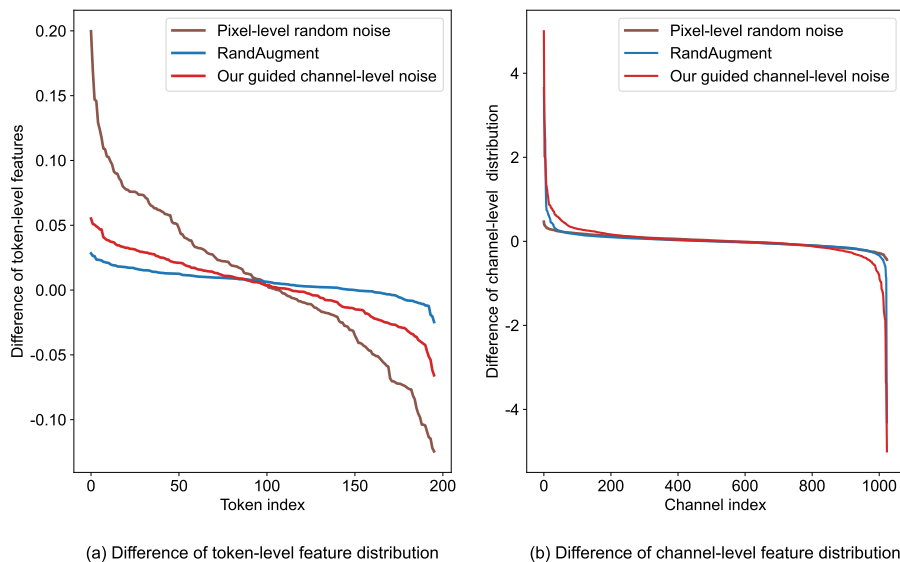

Figure 4: Changes of the latent feature distributions along the token dimension and the channel dimension, between the latent feature of the generated image and that of the original image.

### B.3 How to design prompts for Stable Diffusion?

Text prompts play an important role in image generation of Stable Diffusion. The key goal of prompts in dataset expansion is to further diversify the generated image without changing its class semantics. We find that domain labels, class labels, and adjective words are necessary to make the prompts semantically effective. The class label is straightforward since we need to ensure the created samples have the correct class labels. Here, we show the influence of different domain labels and adjective words on image generation of Stable Diffusion.

**Domain labels.** We first visualize the influence of different domain prompts on image generation. As shown in Figure 5, domain labels help to generate images with different styles. We note that similar domain prompts, like "a sketch of" and "a pencil sketch of", tend to generate images with similar styles. Therefore, it is sufficient to choose just one domain label from a set of similar domain prompts, which does not influence the effectiveness of dataset expansion but helps to reduce the redundancy of domain prompts. In light of this preliminary study, we design the domain label set by ["an image of", "a real-world photo of", "a cartoon image of", "an oil painting of", "a sketch of"].

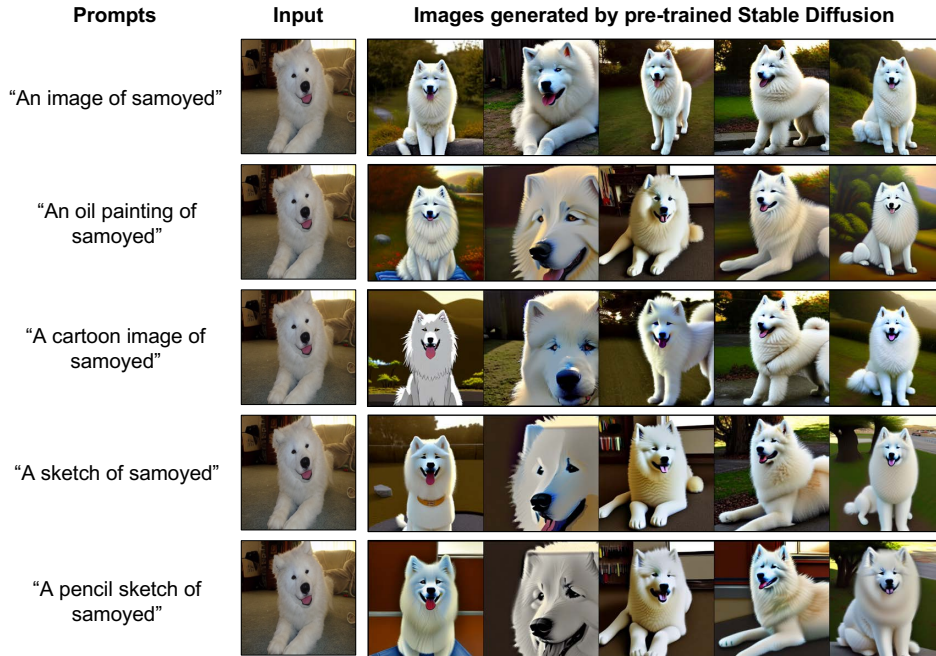

Figure 5: The influence of the domain prompts on image generation of pre-trained Stable Diffusion. The input image is selected from the Pets dataset. Here, the strength hyper-parameter is set to 0.9, and the scale is set to 20.

**Adjective words.** We next show the influence of different adjective words on image generation of Stable Diffusion. As shown in Figure 6, different adjectives help diversify the content of the generated images further, although some adjectives may lead to similar effects on image generation. Based on the visualization exploration, we design the adjective set by ["", "colorful", "stylized", "high-contrast", "low-contrast", "posterized", "solarized", "sheared", "bright", "dark"].

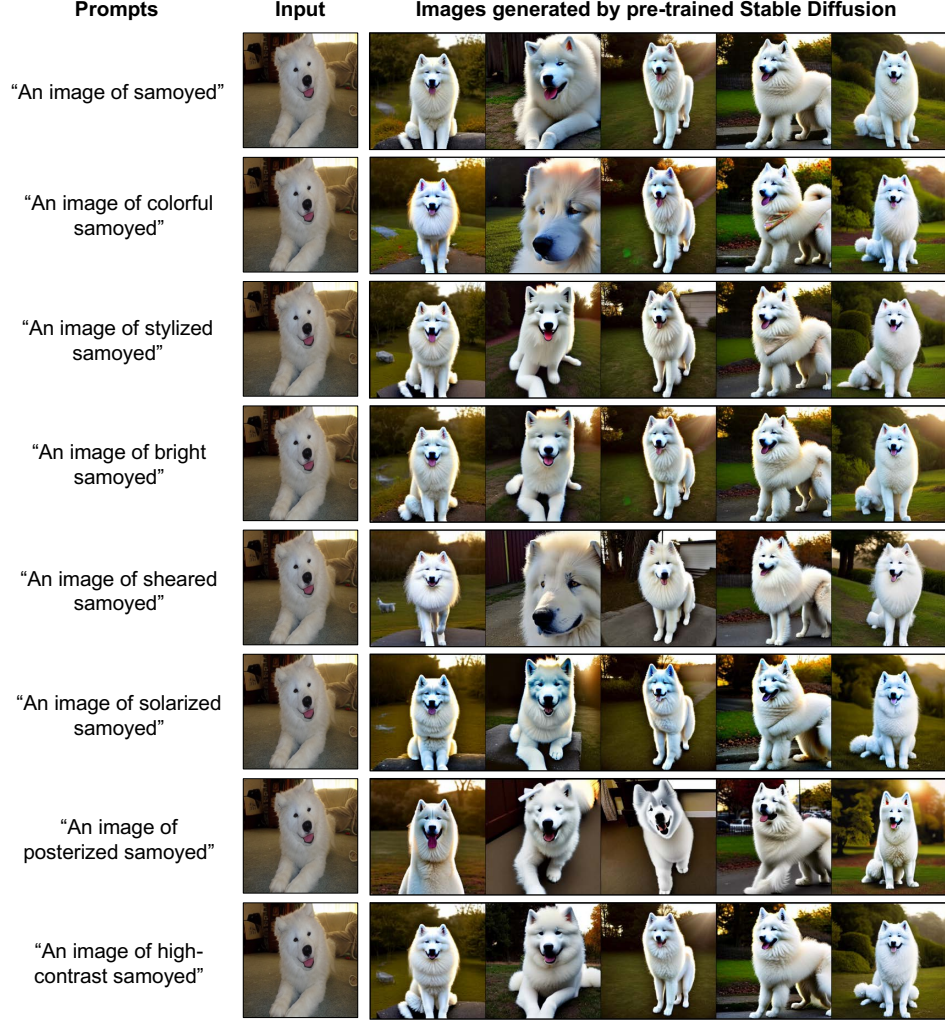

Figure 6: The influence of the adjective prompts on image generation of pre-trained Stable Diffusion. The input image is selected from the Pets dataset. Here, the strength hyper-parameter is set to 0.9, and the scale is set to 20.

## B.4 How to set hyper-parameters for Stable Diffusion?

### B.4.1 Hyper-parameter of strength

The hyper-parameter of the noising strength controls to what degree the initial image is destructed. Setting strength to 1 corresponds to the full destruction of information in the input image while setting strength to 0 corresponds to no destruction of the input image. The higher the strength value is, the more different the generated images would be from the input image. In dataset expansion, the choice of strength depends on the target dataset, but we empirically find that selecting the strength value from [0.5, 0.9] performs better than other values. A too-small value of strength (like 0.1 or 0.3) brings too little new information into the generated images compared to the seed image. At the same time, a too-large value (like 0.99) may degrade the class consistency between the generated images and the seed image when the hyper-parameter of scale is large.

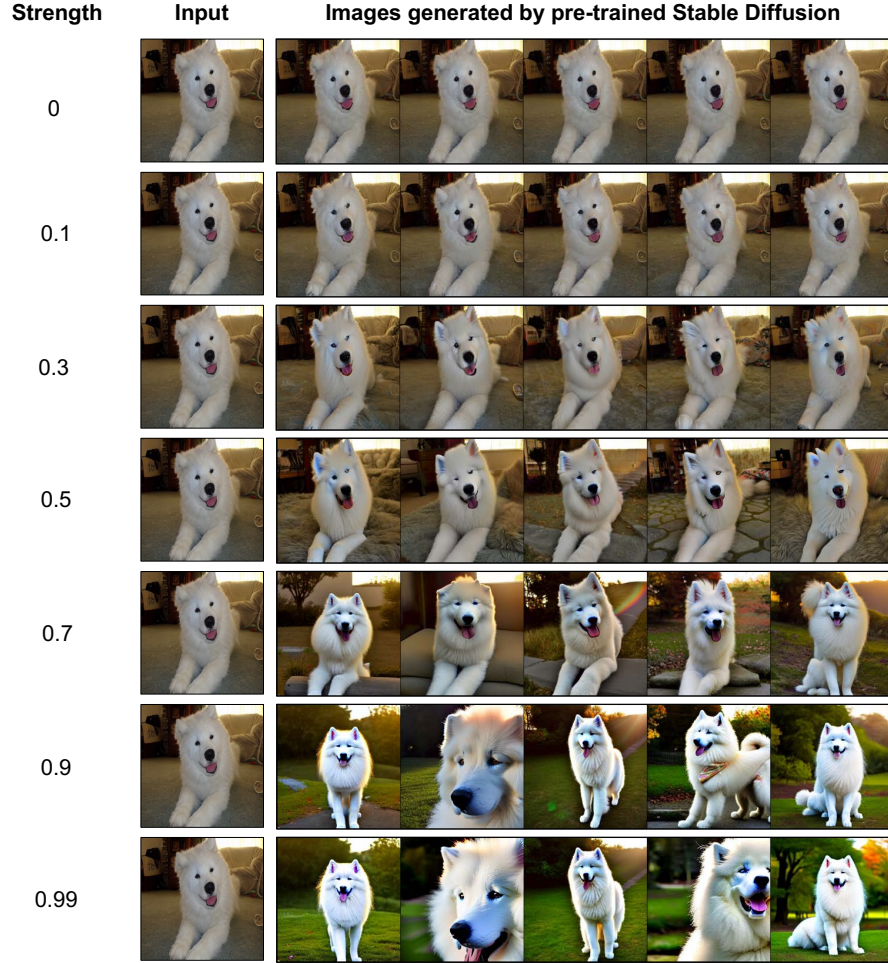

Figure 7: The influence of the "strength" hyper-parameter on image generation of pre-trained Stable Diffusion. The input image is selected from the Pets dataset. The prompt is "an image of colorful samoyed", while the scale is set to 20.

### B.4.2 Hyper-parameter of scale

The hyper-parameter of scale controls the importance of the text prompt guidance on image generation of Stable Diffusion. The higher the scale value, the more influence the text prompt has on the generated images. In dataset expansion, the choice of strength depends on the target dataset, but we empirically find that selecting the strength value from [5, 50] performs better than other values. A too-small value of scale (like 1) brings too little new information into the generated images, while a too-large value (like 100) may degrade the class information of the generated images.

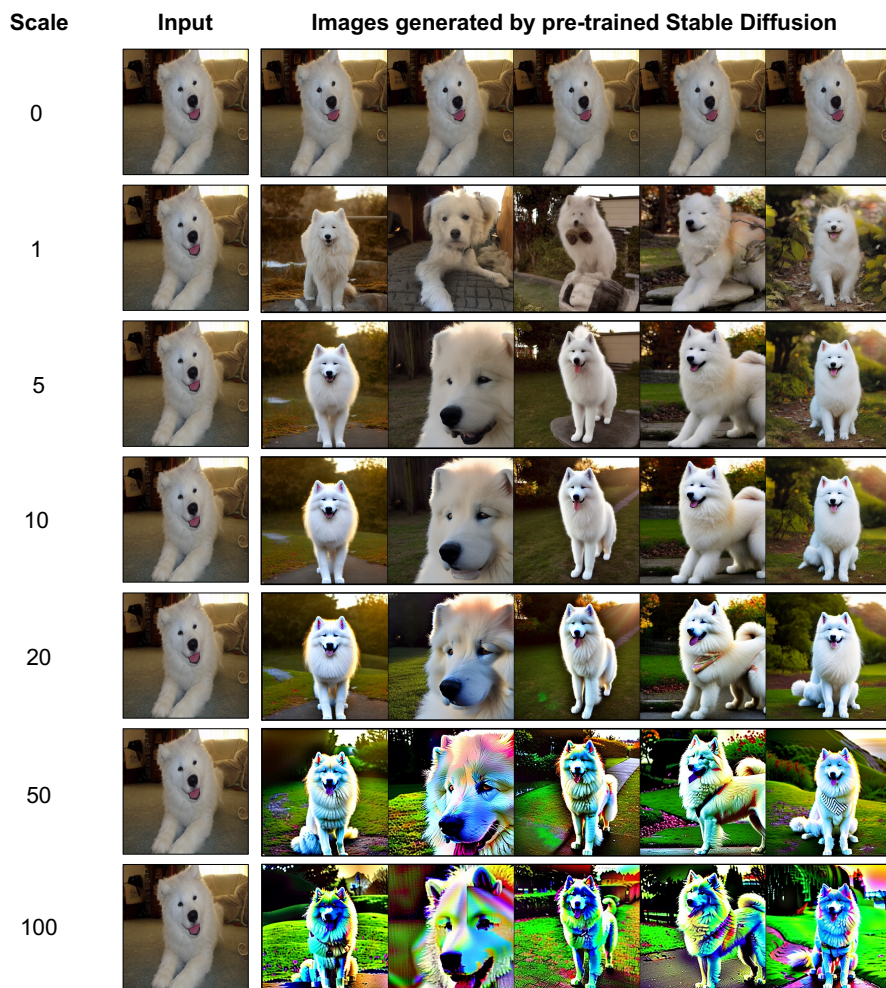

Figure 8: The influence of the "scale" hyper-parameter on image generation of pre-trained Stable Diffusion. The input image is selected from the Pets dataset. The prompt is "an image of colorful samoyed", while the strength is set to 0.9.

## B.5 More discussions on the effectiveness of zero-shot CLIP

In GIF, we exploit the zero-shot discriminability of the pre-trained CLIP to guide dataset expansion. In Section 5.1, we have found that the zero-shot performance of CLIP is not significantly good, particularly on medical image datasets. It is interesting to know whether further fine-tuning CLIP on the target medical dataset can bring further improvement. To determine this, we further compare the results of GIF-MAE with fine-tuned CLIP and with zero-shot CLIP based on OrganSMNIST. To be specific, we add a linear classifier on the top of the CLIP image encoder and fine-tune the CLIP model.

As shown in Table 1, GIF-MAE with fine-tuned CLIP performs only comparably to that with zero-shot CLIP, which reflects that the CLIP’s zero-shot classifier is enough to provide sound guidance. The reason is that, although the zero-shot performance is not that good, **CLIP still plays an important anchor effect in maintaining the class semantics of the generated samples and helps to bring new information**. Let us first recall the class-maintained informativeness score:  $\mathcal{S}_{inf} = s'_j + (s \log(s) - s' \log(s'))$ . Specifically, no matter whether CLIP zero-shot classifier is accurate or not, maximizing  $s'_j$  essentially uses the prediction of **the seed data as an anchor in the CLIP semantic space to regularize the class semantics of the perturbed features**. This ensures the created data maintain the correct class, which is highly important for effective dataset expansion. In addition, maximizing the entropy difference, *i.e.*,  $s \log(s) - s' \log(s')$ , encourages the perturbed feature to have higher entropy regarding CLIP zero-shot prediction. When CLIP zero-shot classifier is accurate, the entropy increment enables the created data to become more difficult to classify regarding CLIP zero-shot discrimination and thus brings more information for classification model training. When CLIP zero-shot classifier is not that accurate, the entropy increment introduces variations into the created data and makes them different from the seed data. **Under the condition that the true class is maintained, this optimization is beneficial to boosting the diversity of the expanded dataset, which is helpful for model training**. Hence, CLIP’s zero-shot abilities are useful for guided imagination in various image domains.

Afterwards, given that zero-shot CLIP can provide valuable guidance despite its limited accuracy, one may wonder whether a random-initialized deep model could serve a similar function. However, as shown in Table 1, using a random-initialized ResNet50 as the guidance model for dataset expansion performs much worse than zero-shot CLIP (*i.e.*, 79.0 vs. 80.6). This could be attributed to the fact that, **although the classifiers of both random ResNet50 and zero-shot CLIP struggle with the target medical classes, the CLIP’s pre-training results in a feature space that is more semantically meaningful and representative than a randomly-initialized ResNet50**. This distinction allows zero-shot CLIP to better anchor the class semantics of synthetic samples, thereby leading to more effective dataset expansion. These empirical observations further verify the effectiveness of using zero-shot CLIP in guiding dataset expansion.

Table 1: Comparison between the model performance by GIF-MAE expansion with zero-shot CLIP guidance and fine-tuned CLIP guidance, as well as random-initialized ResNet-50 guidance, based on the OrganSMNIST medical image dataset. All results are averaged over three runs.

| OrganSMNIST            | Guidance model              | Guidance model accuracy | Model accuracy |
|------------------------|-----------------------------|-------------------------|----------------|
| Original dataset       | -                           | -                       | 76.3           |
| 5×-expanded by GIF-MAE | Random-initialized ResNet50 | 7.1 $\pm$ 0.8           | 79.0 (+2.7)    |
|                        | Fine-tuned CLIP             | 75.6 $\pm$ 1.2          | 80.7 (+4.4)    |
|                        | Zero-shot CLIP (ours)       | 7.7 $\pm$ 0.0           | 80.6 (+4.3)    |

### B.6 Do we need to fine-tune generative models on medical image datasets?

Stable Diffusion (SD) and DALL-E2 are trained on large-scale datasets consisting of natural image and text pairs, showing powerful capabilities in natural image generation and variation. However, when we directly apply them to expand medical image datasets, we find the performance improvement is limited, compared to MAE as shown in Table 2.

Table 2: Accuracy of ResNet-50 trained on the  $5\times$ -expanded medical image datasets by GIF based on SD and DALL-E w/o and w/ fine-tuning. All results are averaged over three runs.

| Dataset                | PathMNIST      | BreastMNIST    | OrganSMNIST    | Average |
|------------------------|----------------|----------------|----------------|---------|
| <i>Original</i>        | $72.4 \pm 0.7$ | $55.8 \pm 1.3$ | $76.3 \pm 0.4$ | 68.2    |
| GIF-MAE                | $82.0 \pm 0.7$ | $73.3 \pm 1.3$ | $80.6 \pm 0.5$ | 78.6    |
| GIF-DALLE (w/o tuning) | $78.4 \pm 1.0$ | $59.3 \pm 2.5$ | $76.4 \pm 0.3$ | 71.4    |
| GIF-DALLE (w/ tuning)  | $84.4 \pm 0.3$ | $76.6 \pm 1.4$ | $80.5 \pm 0.2$ | 80.5    |
| GIF-SD (w/o tuning)    | $80.8 \pm 1.6$ | $59.4 \pm 2.2$ | $79.5 \pm 0.4$ | 73.2    |
| GIF-SD (w/ tuning)     | $86.9 \pm 0.6$ | $77.4 \pm 1.8$ | $80.7 \pm 0.2$ | 81.7    |

To pinpoint the reason, we visualize the generated images by SD on PathMNIST. As shown in Figure 9(top), we find that SD fails to generate photo-realistic medical images, particularly when the hyper-parameter of strength is high. For example, the generated colon pathological images by pre-trained SD look more like a natural sketch and lack medical nidus areas found in the input image. This implies that directly applying SD suffers from significant domain shifts between natural and medical images, preventing the generation of photo-realistic and informative medical samples using its image variation abilities. This issue also happens when applying DALL-E2 for medical dataset expansion. In contrast, MAE is a reconstruction model and does not need to generate new content for the target images, so it has much less negative impact by domain shifts. To address the issue, when applying SD and DALL-E2 to medical domains, we first fine-tune them on target medical datasets, followed by dataset expansion. Specifically, DALL-E2 is fine-tuned based on image reconstruction, while SD is fine-tuned based on Dreambooth [53]. As shown in Figure 9(bottom), the fine-tuned SD is able to generate medical images that are more domain-similar to the input colon pathological image. Thanks to the fine-tuned SD and DALL-E2, GIF is able to bring more significant performance gains over GIF-MAE (cf. Table 2), and thus expands medical image datasets better.

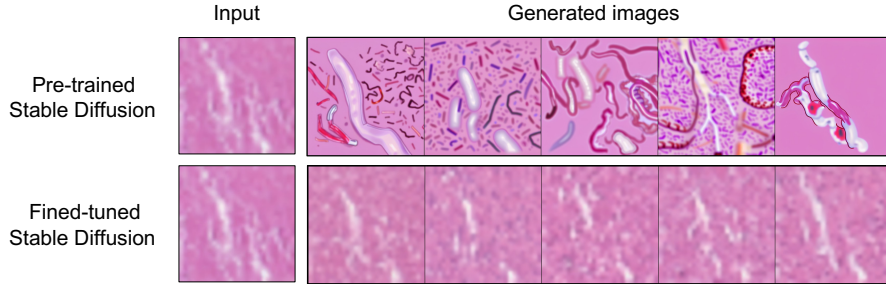

Figure 9: Visualization of the synthetic medical colon pathological images by Stable Diffusion (SD) with or without fine-tuning. Here, the prompt of SD is "a colon pathological sketch of colorful debris", while the strength is set to 0.5. We find that SD suffers from severe domain shifts between natural and medical images and cannot generate photo-realistic and informative medical samples. In contrast, the generated medical images by the fine-tuned SD are more domain-similar to the input colon pathological image.

### B.7 Visualization of created medical images

In the main paper, we visualize the created medical samples by GIF-SD. Here, we further visualize the created medical samples by GIF-MAE and discuss them. As shown in Figure 10, RandAugment randomly varies the medical images based on a set of pre-defined transformations. However, due to its randomness, RandAugment may crop the lesion location of medical images and cannot guarantee the created samples to be informative, even leading to noise samples. In contrast, our GIF-MAE can generate content-consistent images with diverse styles, so it can enrich the medical images while maintaining their lesion location unchanged. Therefore, GIF-MAE is able to expand medical image datasets better than RandAugment, leading to higher model performance improvement (cf. Section 5.1). However, GIF-MAE is unable to generate images with diverse content, which limits its effectiveness. In comparison, SD, after fine-tuning, is able to generate class-maintained samples with more diverse content and styles, and thus achieves better expansion effectiveness (cf. Section 5.1). To summarize, our methods can expand medical image datasets more effectively than data augmentation.

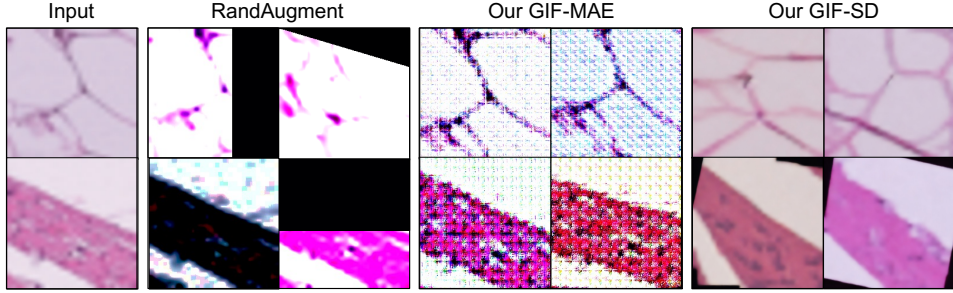

Figure 10: Examples of the created samples for PathMNIST by RandAugment and GIF.

## C Theoretical Analysis

In this appendix, we seek to analyze the benefits of our dataset expansion to model generalization performance. Inspired by [59], we resort to the concept of  $\delta$ -cover [55, 26] to analyze how data diversity influences the generalization error bound. Specifically, "a dataset  $E$  is a  $\delta$ -cover of a dataset  $S$ " means a set of balls with radius  $\delta$  centered at each sample of the dataset  $E$  can cover the entire dataset  $S$ .

**Definition C.1.** ( $\delta$ -cover [55]) Let  $(\mathcal{M}, \rho)$  be a metric space, let  $S \subseteq \mathcal{M}$  and let  $\mu > 0$ . A set  $E \subseteq \mathcal{M}$  is a  $\delta$ -cover for  $S$ , if for every  $s \in S$ , there is an  $e \in E$  such that  $\rho(s, e) \leq \delta$ . The minimal  $\delta$  regarding  $S$  and  $E$  is denoted by  $\delta_{min}$ .

In this work, we follow the assumptions of the work [59] and extend its Theorem 1 to the version of the generalization error bound. Let  $A$  be a learning algorithm that outputs a set of parameters, given a training dataset  $\mathcal{D} = \{x_i, y_i\}_{i \in [n]}$  with  $n$  i.i.d. samples drawn from the data distribution  $\mathcal{P}_{\mathcal{Z}}$ . Assume that the hypothesis function is  $\lambda^\eta$ -Lipschitz continuous, the loss function  $\ell(x, y)$  is  $\lambda^\ell$ -Lipschitz continuous for all  $y$  and bounded by  $L$ , and  $\ell(x_i, y_i; A) = 0$  for  $\forall i \in [n]$ . If the training set  $\mathcal{D}$  is a  $\delta$ -cover of  $\mathcal{P}_{\mathcal{Z}}$ , with probability at least  $1 - \gamma$ , the generalization error bound satisfies:

$$|\mathbb{E}_{x, y \sim \mathcal{P}_{\mathcal{Z}}} [\ell(x, y; A)] - \frac{1}{n} \sum_{i \in [n]} \ell(x_i, y_i; A)| \stackrel{c}{\leq} \delta_{min} (\lambda^\ell + \lambda^\eta LC), \quad (1)$$

where  $C$  is a constant, and the symbol  $\stackrel{c}{\leq}$  indicates "smaller than" up to an additive constant. According to the property of the  $\delta$ -cover, we then define the dataset diversity, called  $\delta$ -diversity, by the inverse of the minimal  $\delta_{min}$ :

**Definition C.2.** ( $\delta$ -diversity) If a dataset  $E$  is a  $\delta$ -cover of the full dataset  $S$ , then the  $\delta$ -diversity of the set  $E$  regarding the full set  $S$  is  $\delta_{div} = \frac{1}{\delta_{min}}$ .

The  $\delta$ -diversity is easy to understand: given a training set  $\mathcal{D} = \{x_i, y_i\}_{i \in [n]}$  that is a  $\delta$ -cover of the data distribution  $\mathcal{P}_{\mathcal{Z}}$ , if the radius  $\delta_{min}$  is high, the diversity of this dataset must be low. Then, we have:

**Theorem C.1.** Let  $A$  denote a learning algorithm that outputs a set of parameters given a dataset  $\mathcal{D} = \{x_i, y_i\}_{i \in [n]}$  with  $n$  i.i.d. samples drawn from distribution  $\mathcal{P}_{\mathcal{Z}}$ . Assume the hypothesis function is  $\lambda^\eta$ -Lipschitz continuous, the loss function  $\ell(x, y)$  is  $\lambda^\ell$ -Lipschitz continuous for all  $y$ , and is bounded by  $L$ , with  $\ell(x_i, y_i; A) = 0$  for all  $i \in [n]$ . If  $\mathcal{D}$  constitutes a  $\delta$ -cover of  $\mathcal{P}_{\mathcal{Z}}$ , then with probability at least  $1 - \gamma$ , the generalization error bound satisfies:

$$|\mathbb{E}_{x, y \sim \mathcal{P}_{\mathcal{Z}}} [\ell(x, y; A)] - \frac{1}{n} \sum_{i \in [n]} \ell(x_i, y_i; A)| \stackrel{c}{\leq} \frac{\lambda^\ell + \lambda^\eta LC}{\delta_{div}}, \quad (2)$$

where  $C$  is a constant, and the symbol  $\stackrel{c}{\leq}$  indicates "smaller than" up to an additive constant.

This theorem shows that the generalization error is bounded by the inverse of  $\delta$ -diversity. That is, the more diverse samples are created by a dataset expansion method, the more improvement of generalization performance would be made in model training. In real small-data applications, the data limitation issue leads the covering radius  $\delta$  to be very large and thus the  $\delta$ -diversity is low, which severely affects the generalization performance of the trained model. More critically, simply increasing the data number (e.g., via data repeating) does not help the generalization since it does not increase  $\delta$ -diversity. Instead of simply increasing the number of samples, our proposed GIF framework adopts two key imagination criteria (i.e., "class-maintained informativeness boosting" and "sample diversity promotion") to guide advanced generative models (e.g., DALL-E2 and Stable Diffusion) to synthesize informative and diversified new samples. Therefore, the expanded dataset would have higher data diversity than random augmentation, which helps to increase  $\delta$ -diversity and thus improves model generalization performance.

## D More Method and Implementation Details

### D.1 Method details of GIF-DALLE

Thanks to strong image generation abilities, GIF-DALLE applies DALL-E2 [49] as its prior model which follows the pipeline described in Section 4. Its pseudo-code is provided in Algorithm 1, where the image embedding obtained by  $f_{\text{CLIP-I}}$  serves as diffusion guidance to help the diffusion decoder to generate new images. GIF-DALLE conducts guided imagination on *the CLIP embedding space*.

We further clarify the implementation of the proposed guidance. Specifically, *class-maintained informativeness*  $\mathcal{S}_{inf}$  encourages the consistency between the predicted classification scores  $s$  and  $s'$ , and improves the information entropy for the predicted score of the generated sample  $s'$ :

$$\mathcal{S}_{inf} = s'_j + (s \log(s) - s' \log(s')), \quad \text{s.t., } j = \arg \max(s). \quad (3)$$

Here,  $j = \operatorname{argmax}(s)$  is the predicted class label of the original latent feature. Such a criterion helps to keep the class semantics of the optimized feature the same as that of the original one in the CLIP embedding space while encouraging the perturbed feature to have higher information entropy regarding CLIP zero-shot predictions. This enables the generated samples to be more informative for follow-up model training. To promote sample diversity, the *diversity*  $\mathcal{S}_{div}$  is computed by the Kullback–Leibler (KL) divergence among all perturbed latent features of a seed sample as follows:

$$\mathcal{S}_{div} = \mathcal{D}_{KL}(f' \| f) = \sigma(f') \log(\sigma(f') / \sigma(f)), \quad (4)$$

where  $f'$  denotes the current perturbed latent feature and  $\bar{f}$  indicates the mean over the  $K$  perturbed latent features of this seed sample. In implementing diversity promotion  $\mathcal{S}_{div}$ , we measure the dissimilarity of two feature vectors by applying the softmax function  $\sigma(\cdot)$  to the latent features, and then measuring the KL divergence between the resulting probability vectors.

---

**Algorithm 1:** GIF-DALLE Algorithm

**Input:** Original small dataset  $\mathcal{D}_o$ ; CLIP image encoder  $f_{\text{CLIP-I}}(\cdot)$ ; DALL-E2 diffusion decoder  $G(\cdot)$ ; CLIP zero-shot classifier  $w(\cdot)$ ; Expansion ratio  $K$ ; Perturbation constraint  $\varepsilon$ .

**Initialize:** Synthetic data set  $\mathcal{D}_s = \emptyset$ ;

**for**  $x \in \mathcal{D}_o$  **do**
$$\mathcal{S}_{inf} = 0;$$
$$f = f_{\text{CLIP-I}}(x) ;$$
$$s = w(f) ;$$
**for**  $i=l,\dots,K$  **do**

Initialize noise  $z_i \sim \mathcal{U}(0, 1)$  and bias  $b_i \sim \mathcal{N}(0, 1)$ ;

$$f'_i = \mathcal{P}_{f,\epsilon}((1 + z_i)f + b_i) ;$$
$$s' = w(f'_i) ;$$
$$\mathcal{S}_{inf} += s'_j + (s \log(s) - s' \log(s')), \text{ s.t. } j = \arg \max(s);$$

informativeness

end

$$\bar{f} = \text{mean}(\{f'_i\}_{i=1}^K);$$
$$\mathcal{S}_{div} = \sum_i \{\mathcal{D}_{KL}(\sigma(f'_i) \parallel \sigma(\bar{f}))\}_{i=1}^K = \sum_i \sigma(f'_i) \log(\sigma(f'_i)/\sigma(\bar{f}));$$
$$\{z'_i, b'_i\}_{i=1}^K \leftarrow \arg \max_{z, b} \mathcal{S}_{inf} + \mathcal{S}_{div};$$
**for**  $i=1,\dots,K$  **do**
$$f_i'' = \mathcal{P}_{f, \epsilon}((1 + z_i')f + b_i') ;$$
$$x_i'' = G(f_i'') ;$$

Add  $x_i'' \rightarrow \mathcal{D}_s$ .

end

end

**Output:** Expanded dataset  $\mathcal{D}_o \cup \mathcal{D}_s$ .

**More implementation details.** In our experiment, DALL-E2 is pre-trained on Laion-400M [58] and then used for dataset expansion. The resolution of the created images by GIF-DALLE is  $64 \times 64$  for model training without further super-resolution. Only when visualizing the created images, we use super-resolution to up-sample the generated images to  $256 \times 256$  for clarification. Moreover, we set  $\varepsilon = 0.1$  in the guided latent feature optimization. During the diffusion process, we set the guidance scale as 4 and adopt the DDIM sampler [62] for 100-step diffusion. For expanding medical image datasets, it is necessary to fine-tune the prior model for alleviating domain shifts.

## D.2 Method details of GIF-SD

GIF-SD applies Stable Diffusion (SD) [52] as its prior model. As its encoder differs from the CLIP image encoder, we slightly modify the pipeline of GIF-SD.

**Pipeline.** As shown in Algorithm 2, GIF-SD first generates a latent feature for the seed image via its image encoder. Following that, GIF-SD conducts prompt-based diffusion for the latent feature, where the generation rule of prompts will be elaborated in Eq. (5). Please note that, with a suitable prompt design, the prompt-based diffusion helps to create more diversified samples. Afterward, GIF-SD conducts *channel-wise* noise perturbation. Here, the latent feature of SD has three dimensions: two spatial dimensions and one channel dimension. As discussed in our preliminary (cf. Appendix B.2), the channel-level latent feature encodes more subtle style information, whereas the spatial-level latent features encode more content information. In light of the findings in this preliminary study, we particularly conduct channel-level noise to optimize the latent features in GIF-SD for further diversifying the style of the generated images while maintaining the content semantics of the latent features (after prompt-guided diffusion) unchanged. Based on the randomly perturbed feature, GIF-SD generates an intermediate image via its image decoder and applies CLIP to conduct zero-shot prediction for both the seed and the intermediate image to compute the guidance. With the guidance, GIF-SD optimizes the latent features for creating more style-diverse samples. Here, GIF-SD conducts guided imagination on its own latent space.

---

### Algorithm 2: GIF-SD Algorithm

---

**Input:** Original small dataset  $\mathcal{D}_o$ ; SD image encoder  $f(\cdot)$  and image decoder  $G(\cdot)$ ; SD diffusion module  $f_{\text{diff}}(\cdot; [\text{prompt}])$ ; CLIP image encoder  $f_{\text{CLIP-I}}(\cdot)$ ; CLIP zero-shot classifier  $w(\cdot)$ ; Expansion ratio  $K$ ; Perturbation constraint  $\epsilon$ .

**Initialize:** Synthetic data set  $\mathcal{D}_s = \emptyset$ ;

```

for  $x \in \mathcal{D}_o$  do
   $\mathcal{S}_{inf} = 0$ ;
   $f = f(x)$ ; // latent feature encoding for seed sample
  Randomly sample a  $[\text{prompt}]$ ; // Prompt generation
   $f = f_{\text{diff}}(f; [\text{prompt}])$ ; // SD latent diffusion
   $s = w(f_{\text{CLIP-I}}(x))$ ; // CLIP zero-shot prediction for seed sample
  for  $i=1, \dots, K$  do
    Initialize noise  $z_i \sim \mathcal{U}(0, 1)$  and bias  $b_i \sim \mathcal{N}(0, 1)$ ;
     $f'_i = \mathcal{P}_{f, \epsilon}((1 + z_i)f + b_i)$ ; // noise perturbation
     $s' = w(f'_i)$ ; // CLIP zero-shot prediction
     $\mathcal{S}_{inf} += s'_j + (s \log(s) - s' \log(s'))$ , s.t.  $j = \arg \max(s)$ ; // class-maintained informativeness
  end
   $\bar{f} = \text{mean}(\{f'_i\}_{i=1}^K)$ ;
   $\mathcal{S}_{div} = \sum_i \{\mathcal{D}_{KL}(\sigma(f'_i) \parallel \sigma(\bar{f}))\}_{i=1}^K = \sum_i \sigma(f'_i) \log(\sigma(f'_i) / \sigma(\bar{f}))$ ; // diversity
   $\{z'_i, b'_i\}_{i=1}^K \leftarrow \arg \max_{z, b} \mathcal{S}_{inf} + \mathcal{S}_{div}$ ; // guided latent optimization
  for  $i=1, \dots, K$  do
     $f''_i = \mathcal{P}_{f, \epsilon}((1 + z'_i)f + b'_i)$ ; // guided noise perturbation
     $x''_i = G(f''_i)$ ; // sample creation
    Add  $x''_i \rightarrow \mathcal{D}_s$ .
  end
end
Output: Expanded dataset  $\mathcal{D}_o \cup \mathcal{D}_s$ .

```

---

**Rule of prompt design.** In our preliminary studies in Appendix B.3, we find that domain labels, class labels, and adjective words are necessary to make the prompts semantically effective. Therefore, we design the prompts using the following rule:

$$\text{Prompt} := [\text{domain}] \text{ of a(n) } [\text{adj}] [\text{class}]. \quad (5)$$

For example, "an oil painting of a colorful fox". To enable the prompts to be diversified, inspired by our preliminary studies, we design a set of domain labels and adjective words for natural image datasets as follows.

- Domain label set: ["an image of", "a real-world photo of", "a cartoon image of", "an oil painting of", "a sketch of"]

- Adjective word set: [" ", "colorful", "stylized", "high-contrast", "low-contrast", "posterized", "solarized", "sheared", "bright", "dark"]

For a seed sample, we randomly sample a domain label and an adjective word from the above sets to construct a prompt. Note that, for medical image datasets, we cancel the domain label set and replace it as the modality of the medical images, *e.g.*, ["Abdominal CT image of"], ["Colon pathological image of"].

**Implementation details.** In our experiment, we implement GIF-SD based on CLIP VIT-B/32 and Stable Diffusion v1-4, which are pre-trained on large datasets and then used for dataset expansion. Here, we use the official checkpoints of CLIP VIT-B/32 and Stable Diffusion v1-4. The resolution of the created images by GIF-SD is  $512 \times 512$  for all datasets. Moreover, for guided latent feature optimization in GIF-SD, we set  $\varepsilon = 0.8$  for natural image datasets and  $\varepsilon = 0.1$  for medical image datasets. Here, we further adjust  $\varepsilon = 4$  for Caltech101 to increase image diversity for better performance. During the diffusion process, we adopt the DDIM sampler [62] for 50-step latent diffusion. Moreover, the hyper-parameters of strength and scale in SD depend on datasets, while more analysis is provided in Appendix B.4. Note that, for expanding medical image datasets, it is necessary to fine-tune the prior model for alleviating domain shifts.

### D.3 Method details of GIF-MAE

Thanks to strong image reconstruction abilities, our GIF-MAE applies the MAE-trained model [21] as its prior model. As its encoder is different from the CLIP image encoder, we slightly modify the pipeline of GIF-MAE.

**Pipeline.** As shown in Algorithm 3, GIF-MAE first generates a latent feature for the seed image via its encoder, and conducts *channel-wise* noise perturbation. Here, the latent feature of MAE has two dimensions: spatial dimension and channel dimension. As discussed in our preliminary (cf. Appendix B.2), the channel-level latent feature encodes more subtle style information, whereas the token-level latent feature encodes more content information. Motivated by the findings in this preliminary study, we particularly conduct channel-level noise to optimize the latent features in our GIF-MAE method for maintaining the content semantics of images unchanged. Based on the perturbed feature, GIF-MAE generates an intermediate image via its decoder and applies CLIP to conduct zero-shot prediction for both the seed and the intermediate image to compute the guidance. With the guidance, GIF-MAE optimizes the latent features for creating content-consistent samples of diverse styles. Here, GIF-MAE conducts guided imagination on its own latent space.

---

#### Algorithm 3: GIF-MAE Algorithm

---

**Input:** Original small dataset  $\mathcal{D}_o$ ; MAE image encoder  $f(\cdot)$  and image decoder  $G(\cdot)$ ; CLIP image encoder  $f_{\text{CLIP-I}}(\cdot)$ ; CLIP zero-shot classifier  $w(\cdot)$ ; Expansion ratio  $K$ ; Perturbation constraint  $\varepsilon$ .

**Initialize:** Synthetic data set  $\mathcal{D}_s = \emptyset$ ;

**for**  $x \in \mathcal{D}_o$  **do**

$\mathcal{S}_{inf} = 0$ ;

$f = f(x)$  ; // latent feature encoding for seed sample

$s = w(f_{\text{CLIP-I}}(x))$  ; // CLIP zero-shot prediction for seed sample

**for**  $i=1, \dots, K$  **do**

Initialize noise  $z_i \sim \mathcal{U}(0, 1)$  and bias  $b_i \sim \mathcal{N}(0, 1)$ ;

$f'_i = \mathcal{P}_{f, \varepsilon}((1 + z_i)f + b_i)$  ; // channel-level noise perturbation

$x'_i = G(f'_i)$  ; // intermediate image generation

$s' = w(f_{\text{CLIP-I}}(x'_i))$ ;

$\mathcal{S}_{inf} += s'_j + (s \log(s) - s' \log(s'))$ , s.t.  $j = \arg \max(s)$  ; // class-maintained informativeness

**end**

$\bar{f} = \text{mean}(\{f'_i\}_{i=1}^K)$ ;

$\mathcal{S}_{div} = \sum_i \{\mathcal{D}_{KL}(\sigma(f'_i) \parallel \sigma(\bar{f}))\}_{i=1}^K = \sum_i \sigma(f'_i) \log(\sigma(f'_i) / \sigma(\bar{f}))$  ; // diversity

$\{z'_i, b'_i\}_{i=1}^K \leftarrow \arg \max_{z, b} \mathcal{S}_{inf} + \mathcal{S}_{div}$  ; // guided latent optimization

**for**  $i=1, \dots, K$  **do**

$f''_i = \mathcal{P}_{f, \varepsilon}((1 + z'_i)f + b'_i)$  ; // guided channel-wise noise perturbation

$x''_i = G(f''_i)$  ; // sample creation

Add  $x''_i \rightarrow \mathcal{D}_s$ .

**end**

**end**

**Output:** Expanded dataset  $\mathcal{D}_o \cup \mathcal{D}_s$ .

---

**Implementation details.** In our experiment, we implement GIF-MAE based on CLIP VIT-B/32 and MAE VIT-L/16, which are pre-trained on large datasets and then fixed for dataset expansion. Here, we use the official checkpoints of CLIP VIT-B/32 and MAE VIT-L/16. The resolution of the created images by GIF-MAE is  $224 \times 224$  for all datasets. Moreover, we set  $\varepsilon = 5$  for guided latent feature optimization in GIF-MAE.

#### D.4 Implementation details of model training

We implement GIF in PyTorch based on CLIP VIT-B/32, DALL-E2, MAE VIT-L/16, and Stable Diffusion (SD) V1-4, which are pre-trained on large datasets and then fixed for dataset expansion. We use the official checkpoints of CLIP VIT-B/32, MAE VIT-L/16, and SD v1-4, and use the DALL-E2 pre-trained on Laion-400M [58]. On medical datasets, since DALL-E2 and SD were initially trained on natural images and suffer from domain shifts to medical domains (please see the discussion in Appendix B.6), we fine-tune them on the target dataset before dataset expansion.

To fairly evaluate the expansion effectiveness of different methods, we use them to expand the original small datasets by the same ratios, followed by training models from scratch on the expanded dataset with the same number of epochs and the same data pre-processing. In this way, the models are trained with the same number of update steps, so that all expansion methods are fairly compared. The expansion ratio depends on the actual demand of real applications. In the main experiment of Section 5.1, CIFAR100-Subset is expanded by  $5\times$ , Pets is expanded by  $30\times$ , and all other datasets are expanded by  $20\times$ . Moreover, all medical image datasets are expanded by  $5\times$ . In addition, all augmentation baselines expand datasets with the same expansion ratio for fair comparisons.

After expansion, we train ResNet-50 [22] from scratch for 100 epochs based on the expanded datasets. During model training, we process images via random resize to  $224\times 224$  through bicubic sampling, random rotation, and random flips. If not specified, we use the SGD optimizer with a momentum of 0.9. We set the initial learning rate (LR) to 0.01 with cosine LR decay, except the initial LR of CIFAR100-Subset and OrganSMNIST is 0.1. The model performance is averaged over three runs in terms of micro accuracy on natural image datasets and macro accuracy on medical image datasets.

#### D.5 Discussions on limitations and broader impact

**Limitations.** We next discuss the limitations of our method.

1. **Performance of generated samples.** The expanded samples are still less informative than real samples. For example, a ResNet-50 trained from scratch on our  $5\times$ -expanded CIFAR100-Subset achieves an accuracy of 61.1%, which lags behind the 71.0% accuracy on the original CIFAR100. This gap signals the potential for advancing algorithmic dataset expansion. Please see Appendix F.6 for detailed discussions. We expect that this pioneering work can inspire more studies to explore dataset expansion so that it can even outperform a human-collected dataset of the same size.
2. **Quality of generated samples.** Some samples might have noise, as exemplified in Figure 5b. Despite seeming less realistic, those samples are created following our guidance (e.g., class-maintained informativeness boosting). This ensures the class consistency of these samples, mitigating potential negative effects on model training. Nonetheless, refining the expansion method to address these noisy cases can further enhance the effectiveness of dataset expansion.
3. **Scope of work.** Our current focus is predominantly on image classification. Exploring the adaptability of our method to other tasks, such as object detection and semantic segmentation, is an intriguing next step.

**Broader impact.** We further summarize our broader impact. Our method can offer a notable reduction in the time and cost associated with manual data collection and annotation for dataset expansion, as discussed in Section 5.2. This can revolutionize how small datasets are expanded, making deep learning more accessible to scenarios with limited data availability (cf. Section 5.1).

## E Dataset Statistics

**The statistics of natural image datasets.** We evaluate our method on six small-scale natural image datasets, including Caltech-101 [16], CIFAR100-Subset [36], Standard Cars [35], Oxford 102 Flowers [43], Oxford-IIIT Pets [44] and DTD [8]. Here, CIFAR100-Subset is an artificial dataset for simulating small-scale datasets by randomly sampling 100 instances per class from the original CIFAR100 dataset, and the total sample number is 10,000. These datasets cover a wide range of classification tasks, including coarse-grained object classification (*i.e.*, CIFAR100-Subset and Caltech-101), fine-grained object classification (*i.e.*, Cars, Flowers and Pets) and texture classification (*i.e.*, DTD). The data statistics of these natural image datasets are given in Table 3. Note that the higher number of classes or the lower number of average samples per class a dataset has, the more challenging the dataset is.

Table 3: Statistics of small-scale natural image datasets.

| Datasets                   | Tasks                                | # Classes | # Samples | # Average samples per class |
|----------------------------|--------------------------------------|-----------|-----------|-----------------------------|
| Caltech101                 | Coarse-grained object classification | 102       | 3,060     | 30                          |
| CIFAR100-Subset            | Coarse-grained object classification | 100       | 10,000    | 100                         |
| Standard Cars              | Fine-grained object classification   | 196       | 8,144     | 42                          |
| Oxford 102 Flowers         | Fine-grained object classification   | 102       | 6,552     | 64                          |
| Oxford-IIIT Pets           | Fine-grained object classification   | 37        | 3,842     | 104                         |
| Describable Textures (DTD) | Texture classification               | 47        | 3,760     | 80                          |

**The statistics of medical image datasets.** To evaluate the effect of dataset expansion on medical images, we conduct experiments on three small-scale medical image datasets. These datasets cover a wide range of medical image modalities, including breast ultrasound (*i.e.*, BreastMNIST [1]), colon pathology (*i.e.*, PathMNIST [32]), and Abdominal CT (*i.e.*, OrganSMNIST [73]). We provide detailed statistics for these datasets in Table 4.

Table 4: Statistics of small-scale medical image datasets. To better simulate the scenario of small medical datasets, we use the validation sets of BreastMNIST and PathMNIST for experiments instead of training sets, whereas OrganSMNIST is based on its training set.

| Datasets             | Data Modality     | # Classes | # Samples | # Average samples per class |
|----------------------|-------------------|-----------|-----------|-----------------------------|
| BreastMNIST [1, 75]  | Breast Ultrasound | 2         | 78        | 39                          |
| PathMNIST [32, 75]   | Colon Pathology   | 9         | 10,004    | 1,112                       |
| OrganSMNIST [73, 75] | Abdominal CT      | 11        | 13,940    | 1,267                       |

## F More Experimental Results and Discussions

### F.1 More comparisons to expansion with augmentations

#### F.1.1 More results on expansion efficiency

In Section 5.1, we have demonstrated the expansion efficiency of our proposed GIF over Cutout, GridMask and RandAugment on the Cars, DTD and Pets datasets. Here, we further report the results on Caltech101, Flowers, and CIFAR100-Subset datasets. As shown in Figure 11,  $5\times$  expansion by GIF-SD and GIF-DALLE has already performed comparably to  $20\times$  expansion of these augmentation methods, while  $10\times$  expansion by GIF-SD and GIF-DALLE outperforms  $20\times$  expansion by these data augmentation methods a lot. This result further demonstrates the effectiveness and efficiency of our GIF, and also reflects the importance of automatically creating informative synthetic samples for model training.

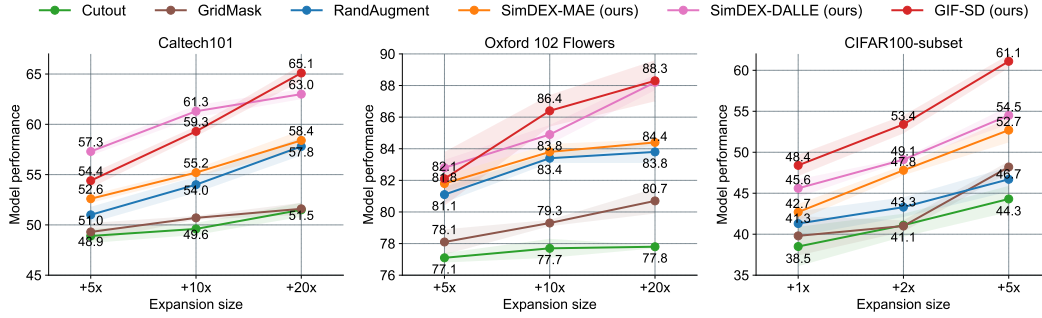

Figure 11: Accuracy of ResNet-50 trained from scratch on the expanded datasets with different expansion ratios based on Caltech101, Flowers, and CIFAR100-Subset datasets.

#### F.1.2 Comparison to Mixup and CutMix

We further compare our method to more advanced augmentation methods. Specifically, we apply Mixup-based methods, *i.e.*, Mixup [83] and CutMix [80], to expand CIFAR100-Subset by  $5\times$  and use the expanded dataset to train the model from scratch. As shown in Table 5, GIF-SD performs much better than Mixup and CutMix, further demonstrating the superiority of our method over augmentation-based expansion methods.

Table 5: Comparison between GIF and Mixup methods for expanding CIFAR100-Subset by  $5\times$ .

| CIFAR100-Subset                    | Accuracy         |
|------------------------------------|------------------|
| <i>Original dataset</i>            | $35.0_{\pm 1.7}$ |
| <i>Expanded dataset</i>            |                  |
| $5\times$ -expanded by Mixup [83]  | $45.6_{\pm 1.2}$ |
| $5\times$ -expanded by CutMix [80] | $50.7_{\pm 0.2}$ |
| $5\times$ -expanded by GIF-SD      | $61.1_{\pm 0.8}$ |

### F.1.3 Comparison with an advanced generative method

We further compare our method with an advanced generative method [23] for dataset expansion. This method includes strategies like language enhancement (LE) [23] and CLIP Filter (CF) [23]. We use this method to expand the CIFAR100-S dataset based on Stable Diffusion (SD). As shown in the following table, SD combined with the method [23] is still noticeably inferior to our GIF-SD for both training from scratch and CLIP tuning. This further demonstrates the superiority of our method.

Table 6: Comparison between GIF and the method [23] for expanding CIFAR100-Subset by  $5\times$ .

| CIFAR100-S                            | Training from scratch | CLIP fine-tuning |
|---------------------------------------|-----------------------|------------------|
| Original dataset                      | 35.0                  | 75.2             |
| 5x-expanded dataset by SD+method [23] | 55.1 (+20.1)          | 77.0 (+1.8)      |
| 5x-expanded dataset by GIF-SD (ours)  | 61.1 (+26.1)          | 79.4 (+4.2)      |

### F.1.4 Comparison to infinite data augmentation

The training time varies based on the specific datasets. However, it is pivotal to note that all dataset expansion methods were compared based on the same expansion ratio, thus ensuring consistent training time/cost and fair comparisons. We acknowledge that training on an expanded dataset will inevitably take longer than training on the original dataset. However, as shown in Section 5.1, the significant improvement in model performance (*i.e.*, by 36.9% on average over six natural image datasets and by 13.5% on average over three medical datasets) makes the increased investment in training time worthwhile.

Despite this, one may wonder how the explored dataset expansion would perform compared to training with infinite data augmentation. Therefore, in this appendix, we further evaluate the performance of infinite data augmentation on the CIFAR100-Subset. Specifically, based on RandAugment, we train ResNet-50 using infinite online augmentation for varying numbers of epochs from 100 to 700. As shown in Table 7, using RandAugment to train models for more epochs leads to better performance, but gradually converges (around 51% accuracy at 500 epochs) and keeps fluctuating afterward. By contrast, our proposed method proves advantageous with the same training consumption costs: training the model on the original CIFAR100-S dataset for 5x more epochs performs much worse than the model trained on our 5x-expanded dataset. This comparison further underscores the effectiveness of our method in achieving higher accuracy without inflating training costs.

Table 7: Comparison between GIF-SD and infinite data augmentation on CIFAR100-Subset. Here, consumption costs equal data number  $\times$  training epoch.

| Methods                        | Epochs | Consumption | Accuracy              |
|--------------------------------|--------|-------------|-----------------------|
| <i>Original</i>                |        |             |                       |
| Standard training              | 100    | 1 million   | 35.0 $\pm$ 1.7        |
| Training with RandAugment      | 100    | 1 million   | 39.6 $\pm$ 2.5        |
| Training with RandAugment      | 200    | 2 million   | 46.9 $\pm$ 0.9        |
| Training with RandAugment      | 300    | 3 million   | 48.1 $\pm$ 0.6        |
| Training with RandAugment      | 400    | 4 million   | 49.6 $\pm$ 0.4        |
| Training with RandAugment      | 500    | 5 million   | 51.3 $\pm$ 0.3        |
| Training with RandAugment      | 600    | 6 million   | 51.1 $\pm$ 0.3        |
| Training with RandAugment      | 700    | 7 million   | 50.6 $\pm$ 1.1        |
| <i>Expanded</i>                |        |             |                       |
| 5 $\times$ -expanded by GIF-SD | 100    | 6 million   | <b>61.1</b> $\pm$ 0.8 |

### F.1.5 Discussion of picking related samples from larger datasets

Picking and labeling data from larger image datasets with CLIP is an interesting idea for dataset expansion. However, such a solution is limited in real applications, since a large-scale related dataset may be unavailable in many image domains (*e.g.*, medical image domains). Moreover, selecting data from different image domains (*e.g.*, from natural images to medical images) is unhelpful for dataset expansion. Despite the above limitations in real applications, we also evaluate this idea on CIFAR100-Subset and investigate whether it helps dataset expansion when there is a larger dataset of the same image nature, *e.g.*, ImageNet. Here, we use CLIP to select and annotate related images from ImageNet to expand CIFAR100-Subset. Specifically, we scan over all ImageNet images and use CLIP to predict them to the class of CIFAR100-Subset. We select the samples with the highest prediction probability higher than 0.1 and expand each class by  $5\times$ . As shown in Table 8, the idea of picking related images from ImageNet makes sense, but performs worse than our proposed method. This result further demonstrates the effectiveness and superiority of our method. In addition, how to better transfer large-scale datasets to expand small datasets is an interesting open question, and we expect to explore it in the future.

Table 8: Comparison between GIF and picking related data from ImageNet for expanding CIFAR100-Subset by  $5\times$ .

| CIFAR100-Subset                                             | Accuracy              |
|-------------------------------------------------------------|-----------------------|
| <i>Original dataset</i>                                     | 35.0 $\pm$ 1.7        |
| <i>Expanded dataset</i>                                     |                       |
| $5\times$ -expanded by picking data from ImageNet with CLIP | 50.9 $\pm$ 1.1        |
| $5\times$ -expanded by GIF-SD                               | <b>61.1</b> $\pm$ 0.8 |

## F.2 More results of benefits to model generalization

In CIFAR100-C [24], there are 15 types of OOD corruption (as shown in Table 9), *i.e.*, Gaussian noise, shot noise, impulse noise, defocus blur, glass blue, motion blur, zoom blur, snow, frost, fog, brightness, contrast, elastic transformation, pixelation, and JPEG compression. Each corruption type has 5 different severity levels: the larger severity level means more severe distribution shifts between CIFAR100 and CIFAR100-C. In Section 5.1 of the main paper, we have shown the empirical benefit of our method to model out-of-distribution (OOD) generalization based on CIFAR100-C with the severity level 3. Here, we further report its performance on CIFAR100-C with other severity levels. As shown in Table 9, our method is able to achieve consistent performance gains across all severity levels, which further verifies the benefits of GIF to model OOD generalization.

Table 9: Corruption Accuracy of ResNet-50 trained from scratch on CIFAR100-S and our 5 $\times$  expanded dataset, under 15 types of corruption in CIFAR100-C with various severity levels.

(a) CIFAR100-C with the severity level 1

| Dataset                                         | Noise       |             |             | Blur        |             |             |             | Weather     |             |             |             | Digital     |             |             |             | Average             |
|-------------------------------------------------|-------------|-------------|-------------|-------------|-------------|-------------|-------------|-------------|-------------|-------------|-------------|-------------|-------------|-------------|-------------|---------------------|
|                                                 | Gauss.      | Shot        | Impul.      | Defoc.      | Glass       | Motion      | Zoom        | Snow        | Frost       | Fog         | Brit.       | Contr.      | Elastic     | Pixel       | JPEG        |                     |
| <i>Original</i>                                 | 25.6        | 29.3        | 25.0        | 34.2        | <b>32.2</b> | 31.7        | 30.9        | 32.3        | 28.3        | 31.8        | 33.7        | 29.2        | 31.7        | 34.1        | 30.9        | 30.7                |
| <i>5<math>\times</math>-expanded by GIF-SD</i>  | 50.3        | 54.6        | 50.8        | 59.2        | 29.4        | 53.7        | 51.9        | 53.1        | 54.0        | 58.7        | 59.5        | 57.1        | 52.5        | 57.9        | <b>54.7</b> | 53.2 (+22.5)        |
| <i>20<math>\times</math>-expanded by GIF-SD</i> | <b>55.0</b> | <b>60.5</b> | <b>54.8</b> | <b>66.1</b> | 30.2        | <b>56.0</b> | <b>58.0</b> | <b>61.1</b> | <b>62.2</b> | <b>65.1</b> | <b>66.2</b> | <b>64.3</b> | <b>59.2</b> | <b>63.8</b> | <b>60.8</b> | <b>58.9 (+27.2)</b> |

(b) CIFAR100-C with the severity level 2

| Dataset                                         | Noise       |             |             | Blur        |             |             |             | Weather     |             |             |             | Digital     |             |             |             | Average             |
|-------------------------------------------------|-------------|-------------|-------------|-------------|-------------|-------------|-------------|-------------|-------------|-------------|-------------|-------------|-------------|-------------|-------------|---------------------|
|                                                 | Gauss.      | Shot        | Impul.      | Defoc.      | Glass       | Motion      | Zoom        | Snow        | Frost       | Fog         | Brit.       | Contr.      | Elastic     | Pixel       | JPEG        |                     |
| <i>Original</i>                                 | 18.6        | 24.4        | 17.4        | 32.5        | <b>31.9</b> | 28.3        | 29.8        | 28.4        | 22.9        | 23.6        | 31.1        | 16.3        | 30.8        | 33.7        | 29.2        | 26.6                |
| <i>5<math>\times</math>-expanded by GIF-SD</i>  | 39.5        | 48.8        | 41.7        | 56.3        | 29.6        | 46.4        | 49.7        | 45.2        | 46.4        | 52.8        | 57.6        | 45.5        | 52.1        | 54.2        | 51.1        | 47.8 (+21.2)        |
| <i>20<math>\times</math>-expanded by GIF-SD</i> | <b>42.7</b> | <b>53.7</b> | <b>43.9</b> | <b>63.1</b> | 31.2        | <b>51.8</b> | <b>56.1</b> | <b>52.0</b> | <b>54.9</b> | <b>60.4</b> | <b>65.2</b> | <b>54.3</b> | <b>59.2</b> | <b>60.0</b> | <b>55.6</b> | <b>52.3 (+25.7)</b> |

(c) CIFAR100-C with the severity level 3

| Dataset                                         | Noise       |             |             | Blur        |             |             |             | Weather     |             |             |             | Digital     |             |             |             | Average             |
|-------------------------------------------------|-------------|-------------|-------------|-------------|-------------|-------------|-------------|-------------|-------------|-------------|-------------|-------------|-------------|-------------|-------------|---------------------|
|                                                 | Gauss.      | Shot        | Impul.      | Defoc.      | Glass       | Motion      | Zoom        | Snow        | Frost       | Fog         | Brit.       | Contr.      | Elastic     | Pixel       | JPEG        |                     |
| <i>Original</i>                                 | 12.8        | 17.0        | 12.5        | 30.5        | 31.7        | 25.2        | 28.6        | 26.5        | 19.0        | 18.6        | 28.3        | 11.5        | 29.5        | 33.6        | 28.8        | 23.6                |
| <i>5<math>\times</math>-expanded by GIF-SD</i>  | 29.7        | 36.4        | 32.7        | 51.9        | 32.4        | 39.2        | 46.0        | 45.3        | 38.1        | 47.1        | 55.7        | 37.3        | 48.6        | 53.2        | 49.4        | 43.3 (+19.3)        |
| <i>20<math>\times</math>-expanded by GIF-SD</i> | <b>31.8</b> | <b>39.2</b> | <b>34.7</b> | <b>58.4</b> | <b>33.4</b> | <b>43.1</b> | <b>51.9</b> | <b>51.7</b> | <b>47.4</b> | <b>55.0</b> | <b>63.3</b> | <b>46.5</b> | <b>54.9</b> | <b>58.0</b> | <b>53.6</b> | <b>48.2 (+24.6)</b> |

(d) CIFAR100-C with the severity level 4

| Dataset                                         | Noise       |             |             | Blur        |             |             |             | Weather     |             |             |             | Digital     |             |             |             | Average             |
|-------------------------------------------------|-------------|-------------|-------------|-------------|-------------|-------------|-------------|-------------|-------------|-------------|-------------|-------------|-------------|-------------|-------------|---------------------|
|                                                 | Gauss.      | Shot        | Impul.      | Defoc.      | Glass       | Motion      | Zoom        | Snow        | Frost       | Fog         | Brit.       | Contr.      | Elastic     | Pixel       | JPEG        |                     |
| <i>Original</i>                                 | 10.8        | 14.3        | 7.7         | 28.5        | <b>29.3</b> | 25.2        | 27.8        | 23.3        | 19.5        | 14.1        | 24.9        | 7.4         | 29.0        | 33.0        | 28.1        | 21.5                |
| <i>5<math>\times</math>-expanded by GIF-SD</i>  | 25.3        | 31.2        | 18.0        | 45.1        | 21.4        | 39.6        | 42.5        | 41.7        | 37.7        | 40.2        | 52.1        | 26.1        | 44.2        | 47.8        | 48.2        | 37.4 (+15.9)        |
| <i>20<math>\times</math>-expanded by GIF-SD</i> | <b>27.4</b> | <b>33.7</b> | <b>20.2</b> | <b>50.7</b> | 21.7        | <b>43.9</b> | <b>47.8</b> | <b>48.8</b> | <b>46.7</b> | <b>47.6</b> | <b>60.7</b> | <b>35.3</b> | <b>47.9</b> | <b>49.3</b> | <b>51.2</b> | <b>42.2 (+20.7)</b> |

(e) CIFAR100-C with the severity level 5

| Dataset                                         | Noise       |             |             | Blur        |             |             |             | Weather     |             |             |             | Digital     |             |             |             | Average             |
|-------------------------------------------------|-------------|-------------|-------------|-------------|-------------|-------------|-------------|-------------|-------------|-------------|-------------|-------------|-------------|-------------|-------------|---------------------|
|                                                 | Gauss.      | Shot        | Impul.      | Defoc.      | Glass       | Motion      | Zoom        | Snow        | Frost       | Fog         | Brit.       | Contr.      | Elastic     | Pixel       | JPEG        |                     |
| <i>Original</i>                                 | 9.4         | 10.7        | 5.5         | 24.9        | <b>28.9</b> | 22.3        | 25.9        | 19.4        | 16.6        | 8.2         | 18.3        | 2.7         | 29.0        | 31.8        | 27.3        | 18.7                |
| <i>5<math>\times</math>-expanded by GIF-SD</i>  | 21.4        | 23.8        | 10.8        | 31.8        | 22.8        | 33.1        | 37.6        | 38.1        | 31.1        | 24.7        | 43.7        | 8.6         | 38.6        | <b>36.0</b> | 45.6        | 29.8 (+11.1)        |
| <i>20<math>\times</math>-expanded by GIF-SD</i> | <b>22.9</b> | <b>25.5</b> | <b>11.1</b> | <b>33.5</b> | 24.1        | <b>36.2</b> | <b>41.8</b> | <b>46.4</b> | <b>38.4</b> | <b>32.1</b> | <b>53.5</b> | <b>13.9</b> | <b>40.4</b> | 32.0        | <b>48.8</b> | <b>33.4 (+14.7)</b> |

### F.3 More results of applicability to various model architectures

In Section 5.1, we have demonstrated the generalizability of our expanded Cars dataset to various model architectures. Here, we further apply the expanded Caltech101, Flowers, DTD, CIFAR100-S, and Pets datasets ( $5\times$  expansion ratio) by GIF-SD and GIF-DALLE to train ResNeXt-50 [70], WideResNet-50 [81] and MobileNet V2 [56] from scratch. Table 10 shows that our expanded datasets bring consistent performance gains for all the architectures on all datasets. This further affirms the versatility of our expanded datasets, which, once expanded, are readily suited for training various model architectures.

Table 10: Model performance of various model architectures trained on  $5\times$  expanded natural image datasets by GIF.

| Dataset                                           | Caltech101 [16]       |                       |                       |                       |                     |
|---------------------------------------------------|-----------------------|-----------------------|-----------------------|-----------------------|---------------------|
|                                                   | ResNet-50             | ResNeXt-50            | WideResNet-50         | MobileNet-v2          | Avg.                |
| <i>Original dataset</i>                           | 26.3 $\pm$ 1.0        | 32.6 $\pm$ 0.5        | 34.7 $\pm$ 0.8        | 33.8 $\pm$ 1.1        | 31.9                |
| <i>5<math>\times</math>-expanded by GIF-DALLE</i> | <b>57.3</b> $\pm$ 0.4 | <b>55.2</b> $\pm$ 0.1 | <b>61.8</b> $\pm$ 0.5 | <b>59.4</b> $\pm$ 0.7 | <b>58.4 (+26.5)</b> |
| <i>5<math>\times</math>-expanded by GIF-SD</i>    | 54.4 $\pm$ 0.7        | 52.8 $\pm$ 1.1        | 60.7 $\pm$ 0.3        | 55.6 $\pm$ 0.5        | 55.9 (+24.0)        |
| Dataset                                           | Cars [35]             |                       |                       |                       |                     |
|                                                   | ResNet-50             | ResNeXt-50            | WideResNet-50         | MobileNet-v2          | Avg.                |
| <i>Original dataset</i>                           | 19.8 $\pm$ 0.9        | 18.4 $\pm$ 0.5        | 32.0 $\pm$ 0.8        | 26.2 $\pm$ 4.2        | 24.1                |
| <i>5<math>\times</math>-expanded by GIF-DALLE</i> | 53.1 $\pm$ 0.2        | 43.7 $\pm$ 0.2        | 60.0 $\pm$ 0.6        | 47.8 $\pm$ 0.6        | 51.2 (+27.1)        |
| <i>5<math>\times</math>-expanded by GIF-SD</i>    | <b>60.6</b> $\pm$ 1.9 | <b>64.1</b> $\pm$ 1.3 | <b>75.1</b> $\pm$ 0.4 | <b>60.2</b> $\pm$ 1.6 | <b>65.0 (+40.9)</b> |
| Dataset                                           | Flowers [43]          |                       |                       |                       |                     |
|                                                   | ResNet-50             | ResNeXt-50            | WideResNet-50         | MobileNet-v2          | Avg.                |
| <i>Original dataset</i>                           | 74.1 $\pm$ 0.1        | 75.8 $\pm$ 1.2        | 79.3 $\pm$ 1.6        | 85.5 $\pm$ 1.0        | 78.7                |
| <i>5<math>\times</math>-expanded by GIF-DALLE</i> | <b>82.8</b> $\pm$ 0.5 | 81.6 $\pm$ 0.4        | 84.6 $\pm$ 0.2        | 88.8 $\pm$ 0.5        | 84.4 (+5.7)         |
| <i>5<math>\times</math>-expanded by GIF-SD</i>    | 82.1 $\pm$ 1.7        | <b>82.0</b> $\pm$ 1.2 | <b>85.0</b> $\pm$ 0.6 | <b>89.0</b> $\pm$ 0.1 | <b>84.5 (+5.8)</b>  |
| Dataset                                           | DTD [8]               |                       |                       |                       |                     |
|                                                   | ResNet-50             | ResNeXt-50            | WideResNet-50         | MobileNet-v2          | Avg.                |
| <i>Original dataset</i>                           | 23.1 $\pm$ 0.2        | 25.4 $\pm$ 0.6        | 26.1 $\pm$ 0.6        | 28.1 $\pm$ 0.9        | 25.7                |
| <i>5<math>\times</math>-expanded by GIF-DALLE</i> | 31.2 $\pm$ 0.9        | 30.6 $\pm$ 0.1        | 35.3 $\pm$ 0.9        | 37.4 $\pm$ 0.8        | 33.6 (+7.9)         |
| <i>5<math>\times</math>-expanded by GIF-SD</i>    | <b>33.9</b> $\pm$ 0.9 | <b>33.3</b> $\pm$ 1.6 | <b>40.6</b> $\pm$ 1.7 | <b>40.8</b> $\pm$ 1.1 | <b>37.2 (+11.5)</b> |
| Dataset                                           | CIFAR100-S [36]       |                       |                       |                       |                     |
|                                                   | ResNet-50             | ResNeXt-50            | WideResNet-50         | MobileNet-v2          | Avg.                |
| <i>Original dataset</i>                           | 35.0 $\pm$ 3.2        | 36.3 $\pm$ 2.1        | 42.0 $\pm$ 0.3        | 50.9 $\pm$ 0.2        | 41.1                |
| <i>5<math>\times</math>-expanded by GIF-DALLE</i> | 54.5 $\pm$ 1.1        | 52.4 $\pm$ 0.7        | 55.3 $\pm$ 0.3        | 56.2 $\pm$ 0.2        | 54.6 (+13.5)        |
| <i>5<math>\times</math>-expanded by GIF-SD</i>    | <b>61.1</b> $\pm$ 0.8 | <b>59.0</b> $\pm$ 0.7 | <b>64.4</b> $\pm$ 0.2 | <b>62.4</b> $\pm$ 0.1 | <b>61.4 (+20.3)</b> |
| Dataset                                           | Pets [44]             |                       |                       |                       |                     |
|                                                   | ResNet-50             | ResNeXt-50            | WideResNet-50         | MobileNet-v2          | Avg.                |
| <i>Original dataset</i>                           | 6.8 $\pm$ 1.8         | 19.0 $\pm$ 1.6        | 22.1 $\pm$ 0.5        | 37.5 $\pm$ 0.4        | 21.4                |
| <i>5<math>\times</math>-expanded by GIF-DALLE</i> | 46.2 $\pm$ 0.1        | 52.3 $\pm$ 1.5        | 66.2 $\pm$ 0.1        | 60.3 $\pm$ 0.3        | 56.3 (+34.9)        |
| <i>5<math>\times</math>-expanded by GIF-SD</i>    | <b>65.8</b> $\pm$ 0.6 | <b>56.5</b> $\pm$ 0.6 | <b>70.9</b> $\pm$ 0.4 | <b>60.6</b> $\pm$ 0.5 | <b>63.5 (+42.1)</b> |

## F.4 More discussions on CLIP

In the following subsections, we provide more discussions on the comparisons with CLIP.

### F.4.1 Why not directly transfer CLIP models to target datasets?

In our proposed GIF framework, we leverage the pre-trained CLIP model to guide dataset expansion. An inevitable question might be: why not directly use or transfer the CLIP model to the target dataset, especially given its proven effectiveness on many natural image datasets? Before delving into that, it is important to note that we aim to tackle small-data scenarios, where only a limited-size dataset is available and there are no large-scale external datasets with a similar nature to the target dataset. Consequently, training a new CLIP model on the target dataset (*e.g.*, in the medical image domains) is not feasible. Therefore, we rely on *publicly available CLIP models* for dataset expansion. Compared to directly using or transferring CLIP models, our dataset expansion introduces a necessary new paradigm for two primary reasons as follows.

First, our GIF method has better applicability to scenarios across various image domains. While CLIP demonstrates good transfer performance on certain natural image datasets, it struggles to achieve this performance on other domains, such as medical image datasets. To illustrate this, we test the linear-probing and fine-tuning performance of the CLIP-trained ResNet-50 model on three medical datasets. As shown in Table 11, directly employing or transferring the CLIP model yielded unsatisfactory results or only marginally improved performance—significantly underperforming compared to our dataset expansion approach. The limited transfer performance is attributed to the fact that, when the pre-trained datasets are highly different from the target datasets, the pre-training weights do not significantly bolster performance compared to training from scratch [48]. Such an issue cannot be resolved by conducting CLIP pre-training on these domains, since there is no large-scale dataset of similar data nature to the target dataset in real scenarios. In contrast, our GIF framework is capable of generating images of similar nature as the target data for dataset expansion, enhancing its applicability to real-world scenarios across diverse image domains.

Second, our dataset expansion can provide expanded datasets suitable for training various network architectures. In certain practical scenarios, such as mobile terminals, the permissible model size is severely limited due to hardware constraints. Nonetheless, the publicly available CLIP checkpoints are restricted to ResNet-50, ViT-B/32, or even larger models, which may not be viable in these constrained settings. In contrast, the expanded dataset by our method can be readily employed to train a various range of model architectures (*cf.* Section 5.1), making it more applicable to scenarios with hardware limitations. One might suggest using CLIP in these situations by conducting knowledge distillation from large CLIP models to facilitate the training of smaller model architectures. However, as indicated in Section 5.1 and Table 11, although knowledge distillation of CLIP does enhance model performance on most datasets, the gains are limited. This arises from two key limitations of CLIP knowledge distillation. First, distillation can only yield marginal improvements when the performance of CLIP on the target dataset (*e.g.*, medical image domains) is not good. Second, distillation tends to be ineffective when there is a mismatch between the architectures of student and teacher models [7, 63]. This comparison further underscores the advantages of our method for training various network architectures, while the CLIP model architectures are fixed and not editable.

Table 11: Comparison between our methods and directly fine-tuning CLIP models on three medical image datasets. All results are averaged over three runs.

| Dataset                        | PathMNIST             | BreastMNIST           | OrganSMNIST           |
|--------------------------------|-----------------------|-----------------------|-----------------------|
| <i>Original</i> dataset        | 72.4 $\pm$ 0.7        | 55.8 $\pm$ 1.3        | 76.3 $\pm$ 0.4        |
| CLIP linear probing            | 74.3 $\pm$ 0.1        | 60.0 $\pm$ 2.9        | 64.9 $\pm$ 0.2        |
| CLIP fine-tuning               | 78.4 $\pm$ 0.9        | 67.2 $\pm$ 2.4        | 78.9 $\pm$ 0.1        |
| CLIP knowledge distillation    | 77.3 $\pm$ 1.7        | 60.2 $\pm$ 1.3        | 77.4 $\pm$ 0.8        |
| 5 $\times$ -expanded by GIF-SD | <b>86.9</b> $\pm$ 0.3 | <b>77.4</b> $\pm$ 1.8 | <b>80.7</b> $\pm$ 0.2 |

#### F.4.2 Discussion on when to use GIF over zero-shot CLIP models

In Section 5.1, it is noted that while zero-shot CLIP performs well on datasets like Caltech 101 and Pets, it struggles with medical image datasets. This poses the question: when should we prefer GIF over pre-trained CLIP models? Although zero-shot CLIP outperforms our GIF-SD on the Caltech 101 and Pets datasets, our method demonstrates superior overall performance across six natural image datasets, as well as medical image datasets (see Section 5.1). Thus, *we recommend using our method as the primary option.*

Meanwhile, if the target dataset has a high distributional similarity with the CLIP training dataset, it may also be beneficial to consider CLIP as an alternative and see whether it can achieve better performance. Nevertheless, it is important to note that, as discussed in Section 5.1 and Appendix F.4.1, CLIP is less effective in some specific application scenarios. For instance, its performance on non-natural image domains like medical images is limited (as shown in Section 5.1). Additionally, publicly available CLIP checkpoints are restricted to larger models like ResNet-50 and ViT-B/32, making them unsuitable for scenarios with hardware constraints (*e.g.*, mobile terminals) where smaller model sizes are necessary. In these scenarios, our proposed method exhibits promising performance, offering a more versatile solution.

## F.5 More ablation studies

### F.5.1 The effectiveness of guidance in GIF-DALLE

GIF optimizes data latent features for informative sample creation by maximizing the designed objective functions of guidance (*i.e.*, class-maintained informativeness  $\mathcal{S}_{inf}$  and sample diversity  $\mathcal{S}_{div}$ ), which are essential for effective dataset expansion. With these essential guidance criteria, as shown in Table 12, our guided expansion framework obtains consistent performance gains compared to unguided expansion with SD, DALL-E2, or MAE, respectively. This verifies the effectiveness of our criteria in optimizing the informativeness and diversity of the created samples.

Table 12: Accuracy of ResNet-50 trained from scratch on small datasets and their expanded datasets by various methods. Here, CIFAR100-Subset is expanded by  $5\times$ , Pets is expanded by  $30\times$ , and all other natural image datasets are expanded by  $20\times$ . All medical image datasets are expanded by  $5\times$ . Moreover, MAE, DALL-E2 and SD (Stable Diffusion) are the baselines of directly using them to expand datasets without our GIF. All results are averaged over three runs.

| Dataset                             | Natural image datasets |      |         |      |            |      |              | Medical image datasets |             |             |              |
|-------------------------------------|------------------------|------|---------|------|------------|------|--------------|------------------------|-------------|-------------|--------------|
|                                     | Caltech101             | Cars | Flowers | DTD  | CIFAR100-S | Pets | Average      | PathMNIST              | BreastMNIST | OrganSMNIST | Average      |
| <i>Original</i>                     | 26.3                   | 19.8 | 74.1    | 23.1 | 35.0       | 6.8  | 30.9         | 72.4                   | 55.8        | 76.3        | 68.2         |
| <i>Expanded by MAE</i>              | 50.6                   | 25.9 | 76.3    | 27.6 | 44.3       | 39.9 | 44.1 (+13.2) | 81.7                   | 63.4        | 78.6        | 74.6 (+6.4)  |
| <i>Expanded by GIF-MAE (ours)</i>   | 58.4                   | 44.5 | 84.4    | 34.2 | 52.7       | 52.4 | 54.4 (+23.5) | 82.0                   | 73.3        | 80.6        | 78.6 (+10.4) |
| <i>Expanded by DALL-E2</i>          | 61.3                   | 48.3 | 84.1    | 34.5 | 52.1       | 61.7 | 57.0 (+26.1) | 82.8                   | 70.8        | 79.3        | 77.6 (+9.4)  |
| <i>Expanded by GIF-DALLE (ours)</i> | 63.0                   | 53.1 | 88.2    | 39.5 | 54.5       | 66.4 | 60.8 (+29.9) | 84.4                   | 76.6        | 80.5        | 80.5 (+12.3) |
| <i>Expanded by SD</i>               | 51.1                   | 51.7 | 78.8    | 33.2 | 52.9       | 57.9 | 54.3 (+23.4) | 85.1                   | 73.8        | 78.9        | 79.3 (+11.1) |
| <i>Expanded by GIF-SD (ours)</i>    | 65.1                   | 75.7 | 88.3    | 43.4 | 61.1       | 73.4 | 67.8 (+36.9) | 86.9                   | 77.4        | 80.7        | 81.7 (+13.5) |

In this appendix, we further explore the individual influence of these criteria on GIF-DALLE. Specifically, as mentioned in Appendix D.1, GIF-DALLE conducts guided imagination on *the CLIP embedding space*, which directly determines the content of the created samples. With the aforementioned essential criteria, as shown in Section 3.2, our GIF-DALLE is able to create motorbike images with more diverse angles of view and even a new driver compared to unguided DALLE expansion. Here, we further dig into how different criteria influence the expansion effectiveness of GIF-DALLE. As shown in Table 13, boosting the class-maintained informativeness  $\mathcal{S}_{inf}$  is the foundation of effective expansion, since it makes sure that the created samples have correct labels and bring new information. Without it, only  $\mathcal{S}_{div}$  cannot guarantee the created samples to be meaningful, although the sample diversity is improved, even leading to worse performance. In contrast, with  $\mathcal{S}_{inf}$ , diversity promotion  $\mathcal{S}_{div}$  can further bring more diverse information to boost data informativeness and thus achieve better performance (cf. Table 13). Note that contrastive entropy increment  $s \log(s) - s' \log(s')$  in class-maintained informativeness plays different roles from diversity promotion  $\mathcal{S}_{div}$ . Contrastive entropy increment promotes the informativeness of each generated image by increasing the prediction difficulty over the corresponding seed image, but this guidance cannot diversify different latent features obtained from the same image. By contrast, the guidance of diversity promotion encourages the diversity of various latent features of the same seed image, but it cannot increase the informativeness of generated samples regarding prediction difficulty. Therefore, using the two guidance together leads the generated images to be more informative and diversified, thus bringing higher performance improvement (cf. Table 13). As a result, as shown in Table 12, with these two essential criteria as guidance, the model accuracy by GIF-DALLE is 3.3% accuracy higher than unguided data generation with DALL-E2.

Table 13: Ablation of guidance in GIF-DALLE for expanding CIFAR100-Subset by  $5\times$ .

| Method    | $\mathcal{S}_{inf}$ | $\mathcal{S}_{div}$ | CIFAR100-Subset |
|-----------|---------------------|---------------------|-----------------|
| GIF-DALLE |                     |                     | 52.1 $\pm$ 0.9  |
|           | ✓                   |                     | 53.1 $\pm$ 0.3  |
|           |                     | ✓                   | 51.8 $\pm$ 1.3  |
|           | ✓                   | ✓                   | 54.5 $\pm$ 1.1  |

### F.5.2 The effectiveness of guidance in GIF-SD

We next analyze GIF-SD. As mentioned in Appendix D.2, we conduct *channel-wise* noise perturbation for latent optimization in GIF-SD. As analyzed in Appendix B.2, the channel-level latent feature encodes more subtle style information, and conducting channel-level noise perturbation diversifies the style of images while maintaining its content integrity. Therefore, our guided optimization particularly diversifies the style of the created images, without changing the content semantics of the latent features after diffusion (cf. Figure 12). Moreover, the prompt-guided diffusion with our explored prompts helps to enrich image styles further (*e.g.*, cartoon or oil painting). Hence, combining both of them enables GIF-SD to create new samples with much higher diversity (cf. Figure 12).

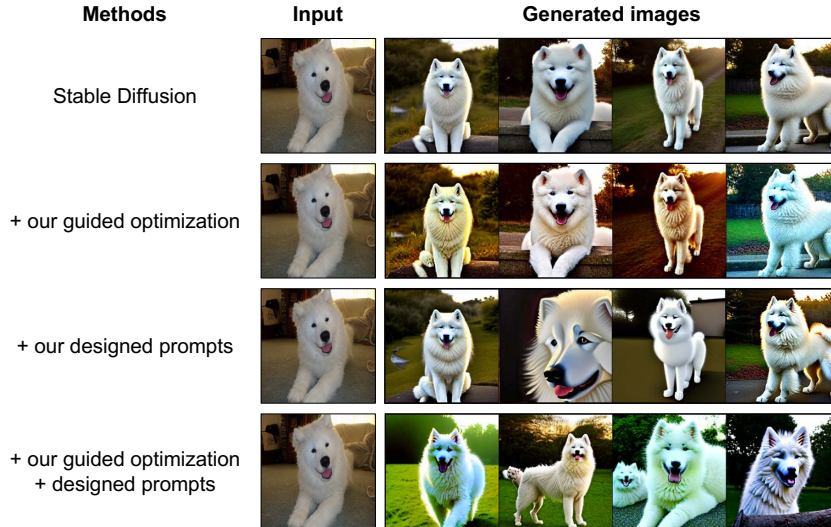

Figure 12: Visualization of the generated images by SD with our explored guided optimization and designed prompts.

We then investigate the individual influence of our guidance criteria on GIF-SD on the basis of our prompt-guided diffusion. As shown in Table 14, both the class-maintained informativeness guidance  $\mathcal{S}_{inf}$  and the diversity promotion guidance  $\mathcal{S}_{div}$  contribute to model performance. One interesting thing is that, unlike GIF-DALLE that does not work without  $\mathcal{S}_{inf}$ , GIF-SD can work well using only the diversity promotion guidance  $\mathcal{S}_{div}$ . The key reason is that GIF-SD conducts channel-level noise perturbation over latent features and particularly diversifies the style of the created images without changing the content semantics of the latent features after diffusion. Therefore, the class semantics can be maintained well when only promoting sample diversity. Moreover, combining both guidance criteria enables GIF-SD to achieve the best expansion effectiveness (cf. Table 14), leading to promising performance gains (*i.e.*, 13.5% accuracy improvement on average over six natural image datasets) compared to unguided expansion with SD (cf. Table 12).

Table 14: Ablation of guidance and prompts in GIF-SD for expanding CIFAR100-Subset by  $5\times$ .

| Method | Designed prompts | $\mathcal{S}_{inf}$ | $\mathcal{S}_{div}$ | CIFAR100-Subset |
|--------|------------------|---------------------|---------------------|-----------------|
| GIF-SD |                  |                     |                     | 52.9 $\pm$ 0.8  |
|        | ✓                |                     |                     | 56.2 $\pm$ 1.0  |
|        | ✓                | ✓                   |                     | 59.6 $\pm$ 1.1  |
|        | ✓                |                     | ✓                   | 59.4 $\pm$ 1.2  |
|        | ✓                | ✓                   | ✓                   | 61.1 $\pm$ 0.8  |

### E.5.3 Discussions on the constraint of the perturbed feature in GIF

The hyper-parameter  $\varepsilon$  is used to ensure that the perturbed feature does not deviate from the input feature significantly, and its value depends on the prior model and target dataset. As described in Appendix D, for GIF-SD, we set  $\varepsilon = 0.8$  for most natural image datasets and further adjust  $\varepsilon = 4$  for Caltech101 to increase its dataset diversity for better performance. Once determined for a given prior model and target dataset,  $\varepsilon$  remains fixed for various expansion ratios. As shown in the following table, there is no need to increase when the expansion ratio becomes larger.

Table 15: Ablation of hyper-parameter  $\varepsilon$  on Caltech101 for GIF-SD.

| $\varepsilon$ on Caltech101     | 2    | 4           | 8    |
|---------------------------------|------|-------------|------|
| 5 $\times$ -expanded by GIF-SD  | 53.0 | <b>54.4</b> | 53.6 |
| 10 $\times$ -expanded by GIF-SD | 59.2 | <b>59.3</b> | 58.2 |

## F.6 Discussion of training models with only expanded images

It is interesting to know how the model performs when trained with only the created images by our method. To this end, we train ResNet-50 from scratch using only images generated by GIF-DALLE on the CIFAR100-Subset and compare the result with a model trained on the real images of the CIFAR100-Subset.

We report the results regarding  $1\times$  expansion in Table 16. We find that the model trained with only  $1\times$  synthetic images performs worse than the model trained with the original dataset, indicating that the quality of synthetic data still lags behind that of real images. Please note that this does not degrade our contribution, since our work aims to expand small datasets rather than replace them entirely. Moreover, mixing the original images with the created images to the same size as the original dataset can lead to better performance than using only the original dataset. This suggests that the created images are not a simple repetition of the original dataset but offer new information that is useful for model training. Lastly, the model trained on the complete  $1\times$ -expanded dataset significantly outperforms the models trained either only on the original dataset or solely on the generated images, underscoring the potential of synthetic images in expanding small-scale datasets for model training.

Table 16: Performance of the model trained with only the expanded data of the  $5\times$ -expanded CIFAR100-Subset dataset by GIF-DALLE.

| CIFAR100-Subset                                                                              | Data amount | Accuracy         |
|----------------------------------------------------------------------------------------------|-------------|------------------|
| <i>Training with real images in original dataset</i>                                         | 10,000      | $35.0_{\pm 1.7}$ |
| <i>Training with only the <math>1\times</math>-created data by GIF-DALLE</i>                 | 10,000      | $21.0_{\pm 0.7}$ |
| <i>Training with mixing original data and <math>1\times</math>-created data by GIF-DALLE</i> | 10,000      | $37.2_{\pm 0.8}$ |
| <i>Training with <math>1\times</math>-expanded dataset by GIF-DALLE</i>                      | 20,000      | $45.6_{\pm 1.1}$ |

We next report the results regarding  $5\times$  expansion in Table 17. The model trained with  $5\times$  synthetic images has already performed comparably to the model trained with real images. This result further verifies the effectiveness of our explored dataset expansion method. Moreover, the model trained with the full  $5\times$ -expanded dataset performs much better than that trained with only the original dataset or with only the generated images. This further shows that using synthetic images for model training is a promising direction. We expect that our innovative work on dataset expansion can inspire more studies to explore this direction in the future.

Table 17: Performance of the model trained with only the expanded data of the  $5\times$ -expanded CIFAR100-Subset dataset by GIF-DALLE.

| CIFAR100-Subset                                                              | Data amount | Accuracy         |
|------------------------------------------------------------------------------|-------------|------------------|
| <i>Training with real images in original dataset</i>                         | 10,000      | $35.0_{\pm 1.7}$ |
| <i>Training with only the <math>5\times</math>-created data by GIF-DALLE</i> | 50,000      | $35.2_{\pm 1.3}$ |
| <i>Training with <math>5\times</math>-expanded dataset by GIF-DALLE</i>      | 60,000      | $54.5_{\pm 1.1}$ |

## F.7 Effectiveness on long-tailed classification dataset

In previous experiments, we have demonstrated the effectiveness of our proposed method on relatively balanced small-scale datasets. However, real-world classification datasets are usually class imbalanced and even follow a long-tailed class distribution. Therefore, we further apply GIF-SD to expand a long-tailed dataset, *i.e.*, CIFAR100-LT [3] (with the imbalance ratio of 100), to see whether it is also beneficial to long-tailed learning. Here, we train ResNet-50 from scratch with the cross-entropy loss or the balanced softmax loss [31] for 200 epochs, where Balanced Softmax [31, 86] is a class re-balancing loss designed for long-tailed learning.

As shown in Table 18, compared to training with cross-entropy directly on the original CIFAR100-LT dataset,  $20\times$  expansion by our GIF-SD leads to a 13.5% model accuracy gain. This demonstrates the effectiveness of our proposed method in long-tailed learning. More encouragingly, our GIF expansion boosts the performance of few-shot classes more than many-shot classes, which means that GIF helps to address the issue of class imbalance.

Besides the cross-entropy loss, our dataset expansion is also beneficial to model training with long-tailed losses, such as Balanced Softmax. As shown in Table 18,  $20\times$  expansion by GIF-SD boosts the accuracy of the Balanced Softmax trained model by 14.8%, and significantly improves its tail-class performance by 26.8%. These results further demonstrate the applicability of our GIF to long-tailed learning applications. We expect that this work can inspire more long-tailed learning studies to explore dataset expansion since information lacking is an important challenge in long-tailed learning [87].

Table 18: Effectiveness of GIF-SD for expanding CIFAR100-LT (imbalance ratio 100) by  $10\times$ , where all models are trained for 200 epochs. Here, Balanced Softmax [31, 86] is a class re-balancing losses designed for long-tailed learning.

| CIFAR100-LT                                     | Training losses  | Many-shot classes | Medium-shot classes | Few-shot classes | Overall      |
|-------------------------------------------------|------------------|-------------------|---------------------|------------------|--------------|
| <i>Original</i>                                 | Cross-entropy    | 70.5              | 41.1                | 8.1              | 41.4         |
| <i>20<math>\times</math>-expanded by GIF-SD</i> | Cross-entropy    | 79.5 (+9.0)       | 54.9 (+13.8)        | 26.4 (+18.3)     | 54.9 (+13.5) |
| <i>Original</i>                                 | Balanced Softmax | 67.9              | 45.8                | 17.7             | 45.1         |
| <i>20<math>\times</math>-expanded by GIF-SD</i> | Balanced Softmax | 73.7 (+5.8)       | 59.2 (+13.4)        | 44.5 (+26.8)     | 59.9 (+14.8) |

## F.8 Effectiveness on larger-scale dataset

In previous experiments, we have demonstrated the effectiveness of our proposed method on small-scale natural and medical image datasets. In addition to that, one may also wonder whether our method can be applied to larger-scale datasets. Although expanding larger-scale datasets is not the goal of this paper, we also explore our method to expand the full CIFAR100 by  $5\times$  for model training. As shown in Table 19, compared to direct training on the original CIFAR100 dataset, our GIF-SD leads to a 9.4% accuracy gain and GIF-DALLE leads to an 8.7% accuracy gain. Such encouraging results verify the effectiveness of our methods on larger-scale datasets.

Table 19: Effectiveness of GIF for expanding the full CIFAR100.

| Dataset                                           | CIFAR100              |
|---------------------------------------------------|-----------------------|
| <i>Original</i>                                   | 70.9 $\pm$ 0.6        |
| <i>Expanded</i>                                   |                       |
| <i>5<math>\times</math>-expanded by GIF-DALLE</i> | 79.6 $\pm$ 0.3        |
| <i>5<math>\times</math>-expanded by GIF-SD</i>    | <b>80.3</b> $\pm$ 0.3 |

## F.9 Safety check

Ethical considerations, especially in AI research and data generation, are indeed paramount. Our approach is constructed with care to avoid negative implications, as evidenced in the following points:

- **Controlled generation:** In our approach, the generation of synthetic data is driven by our expansion guidances, which ensure that new data is derived directly and meaningfully from the original dataset. This controlled mechanism minimizes the risks of creating unrelated or potentially harmful images.
- **No personal or sensitive data:** It is also worth noting that our method primarily focuses on publicly available datasets like CIFAR, Stanford Cars, and similar, which do not contain personal or sensitive information. As such, the risks related to privacy breaches or misrepresentations are substantially diminished.

Following this, we further employ the Google Cloud Vision API<sup>2</sup> to perform a safety check on the 50,000 images generated during 5x-expansion of CIFAR100-S by GIF-SD. The Google Cloud Vision API is a tool from Google that uses deep learning to analyze and categorize content in images, commonly used for safety checks. It evaluates the likelihood of the image containing **adult** themes such as nudity or sexual activities, alterations made for humor or offensiveness (**spoof**), **medical** relevance, **violent** content, and **racy** elements which could include suggestive clothing or poses. This assessment aids in ensuring that images adhere to content standards and are appropriate for their target audiences.

As evidenced by Table 20, the synthetic images by our method are safe and harmless. To be specific, the majority of our generated images are categorized as either "Very unlikely" or "Unlikely" across all five metrics. Moreover, for categories like "Adult" and "Medical", the likelihood is almost negligible. Moreover, the visualized images in Appendix G also highlight the benign nature of the images produced by our method.

Table 20: Safety check of the generated images of CIFAR100-S by our GIF-SD, in terms of different metrics of Google Cloud Vision API.

| Metrics  | Very unlikely | Unlikely | Neutral | Likely | Very likely |
|----------|---------------|----------|---------|--------|-------------|
| Adult    | 96%           | 4%       | 0%      | 0%     | 0%          |
| Spoof    | 82%           | 15%      | 3%      | 0%     | 0%          |
| Medical  | 86%           | 14%      | 0%      | 0%     | 0%          |
| Violence | 69%           | 31%      | 0%      | 0%     | 0%          |
| Racy     | 66%           | 25%      | 9%      | 0%     | 0%          |

<sup>2</sup><https://cloud.google.com/vision/docs/detecting-safe-search>

## G More Visualization Results

This appendix provides more visualized results for the created samples by our methods on various natural image datasets. Specifically, we report the synthetic images by GIF-SD on Caltech101 in Figure 13, those by GIF-DALLE in Figure 14 and those by GIF-MAE in Figure 15. The visualized results show that our GIF-SD and GIF-DALLE can create semantic-consistent yet content-diversified images well, while GIF-MAE can generate content-consistent yet highly style-diversified images. The visualization of GIF-SD and GIF-DALLE on other natural image datasets are shown in Figures 16-25.

### G.1 Visualization of the expanded images on Caltech101

#### G.1.1 Visualization of the expanded images by GIF-SD on Caltech101

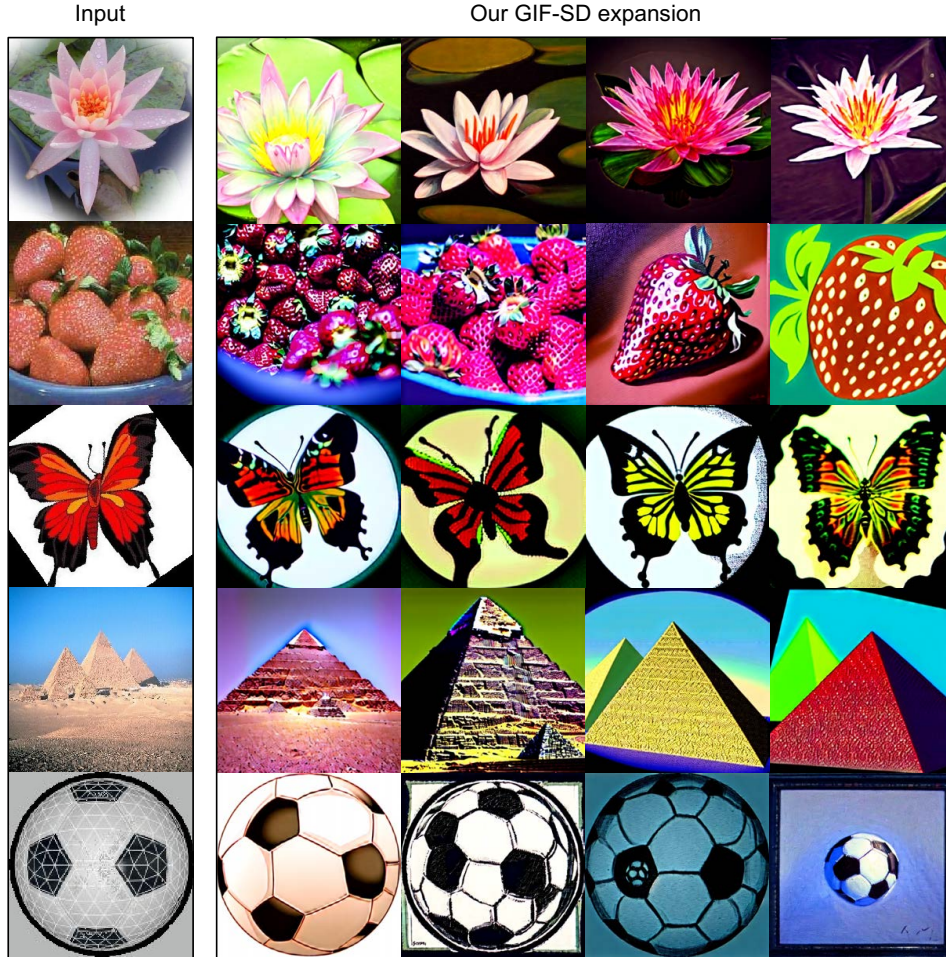

Figure 13: Visualization of the created samples on Caltech101 by GIF-SD.

### G.1.2 Visualization of the expanded images by GIF-DALLE on Caltech101

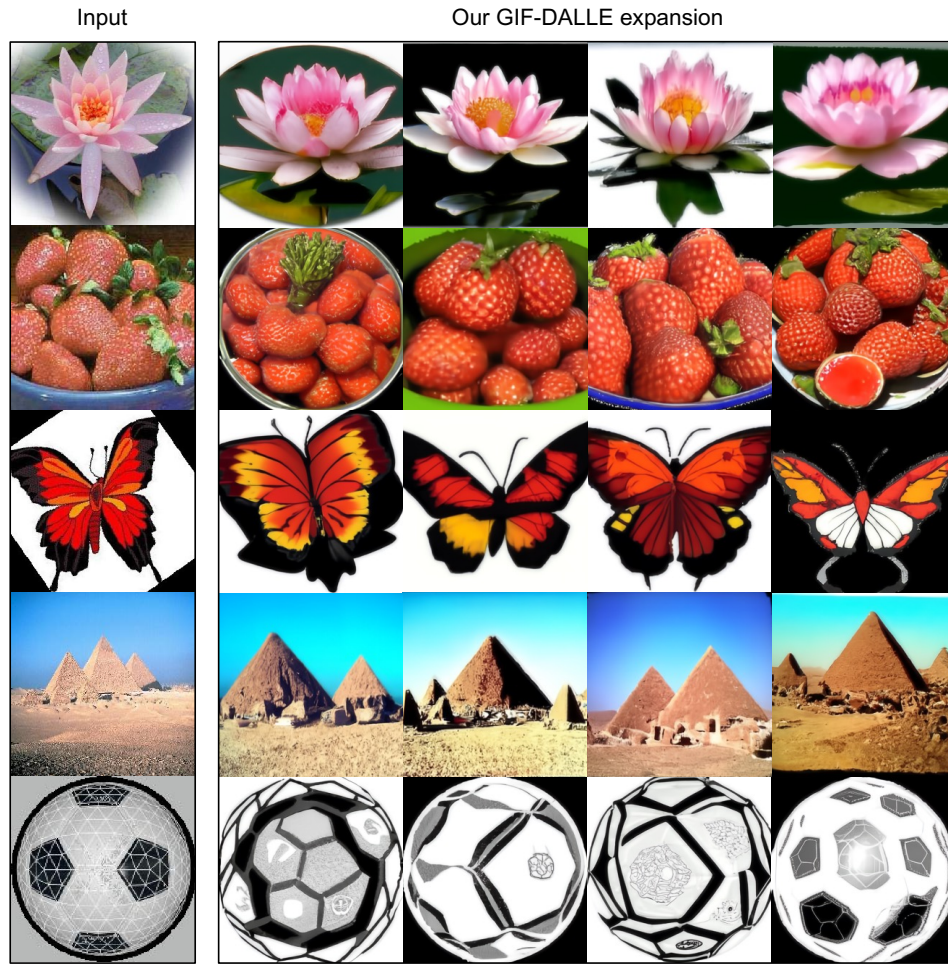

Figure 14: Visualization of the created samples on Caltech101 by GIF-DALLE.

### G.1.3 Visualization of the expanded images by GIF-MAE on Caltech101

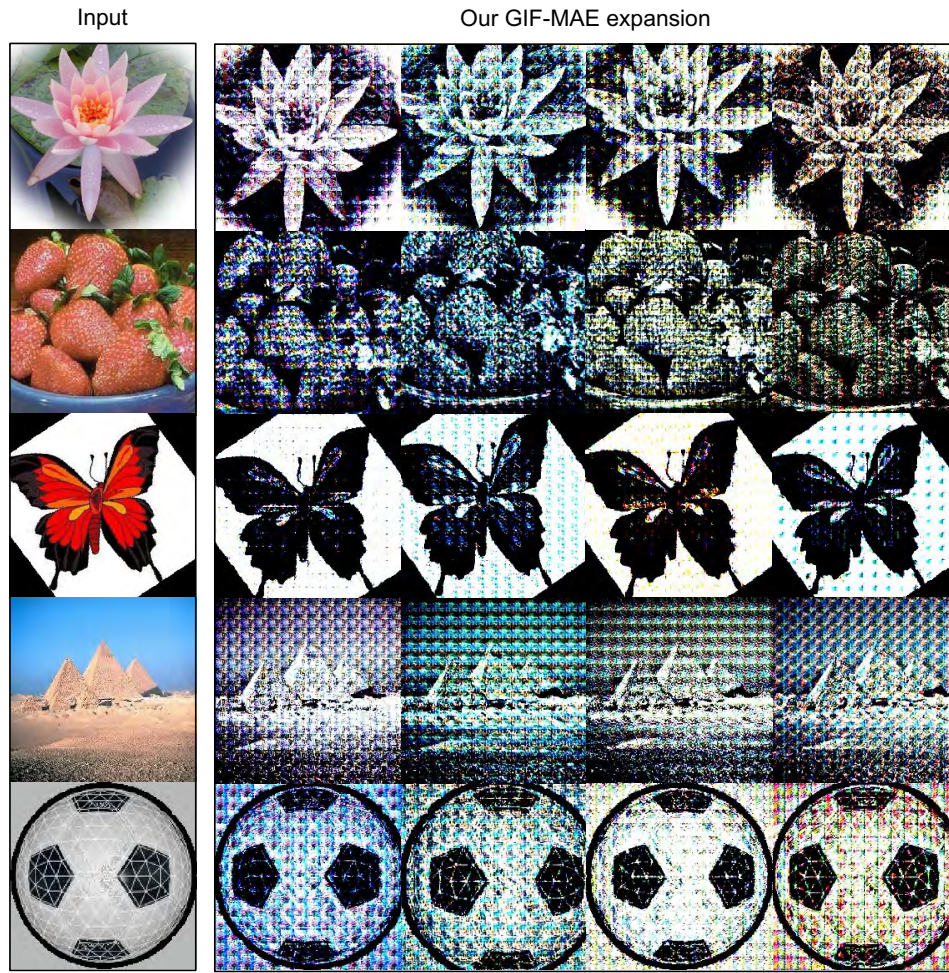

Figure 15: Visualization of the created samples on Caltech101 by GIF-MAE.

## G.2 Visualization of the expanded images on Cars

### G.2.1 Visualization of the expanded images by GIF-SD on Cars

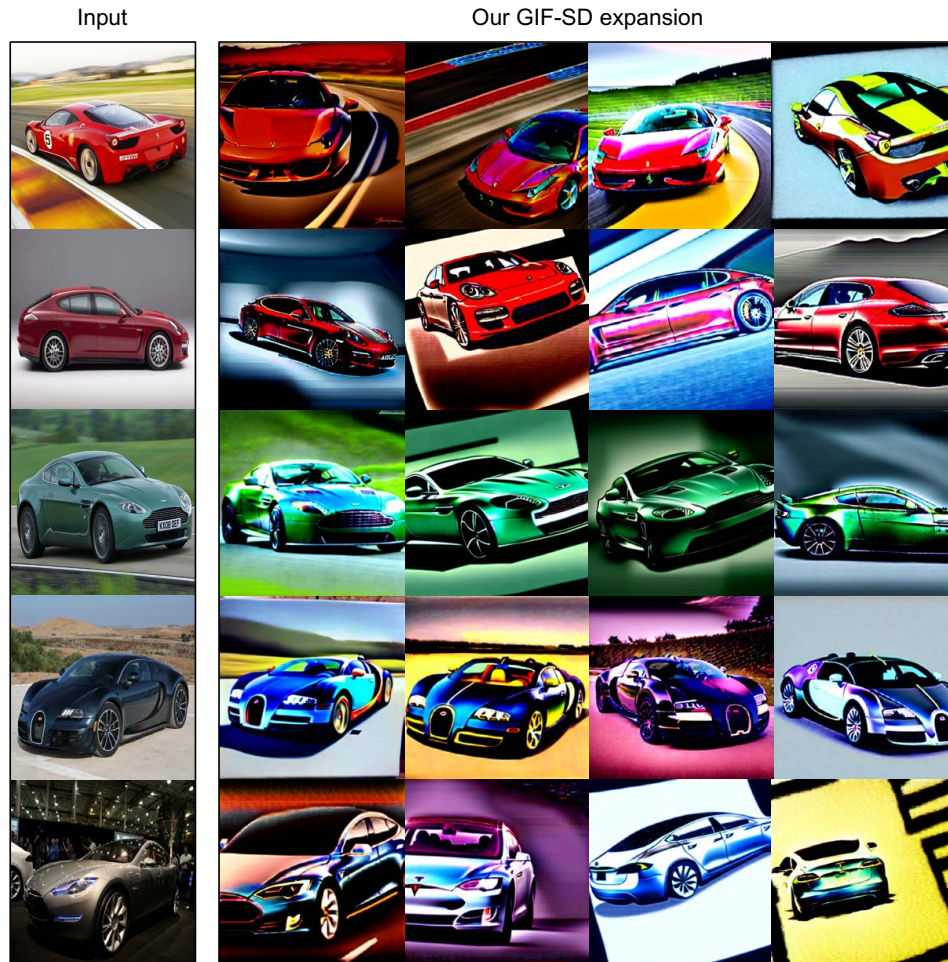

Figure 16: More visualization of the synthetic samples on Cars by GIF-SD.

### G.2.2 Visualization of the expanded images by GIF-DALLE on Cars

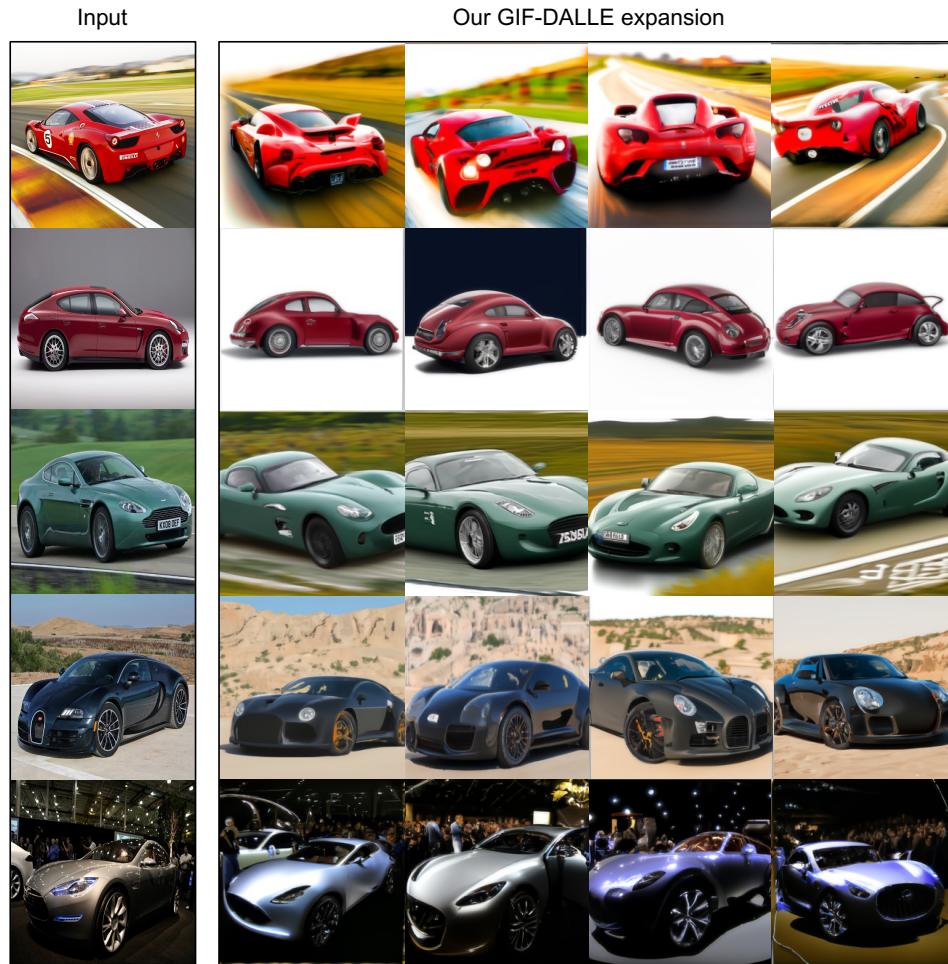

Figure 17: More visualization of the synthetic samples on Cars by GIF-DALLE.

### G.3 Visualization of the expanded images on Flowers

#### G.3.1 Visualization of the expanded images by GIF-SD on Flowers

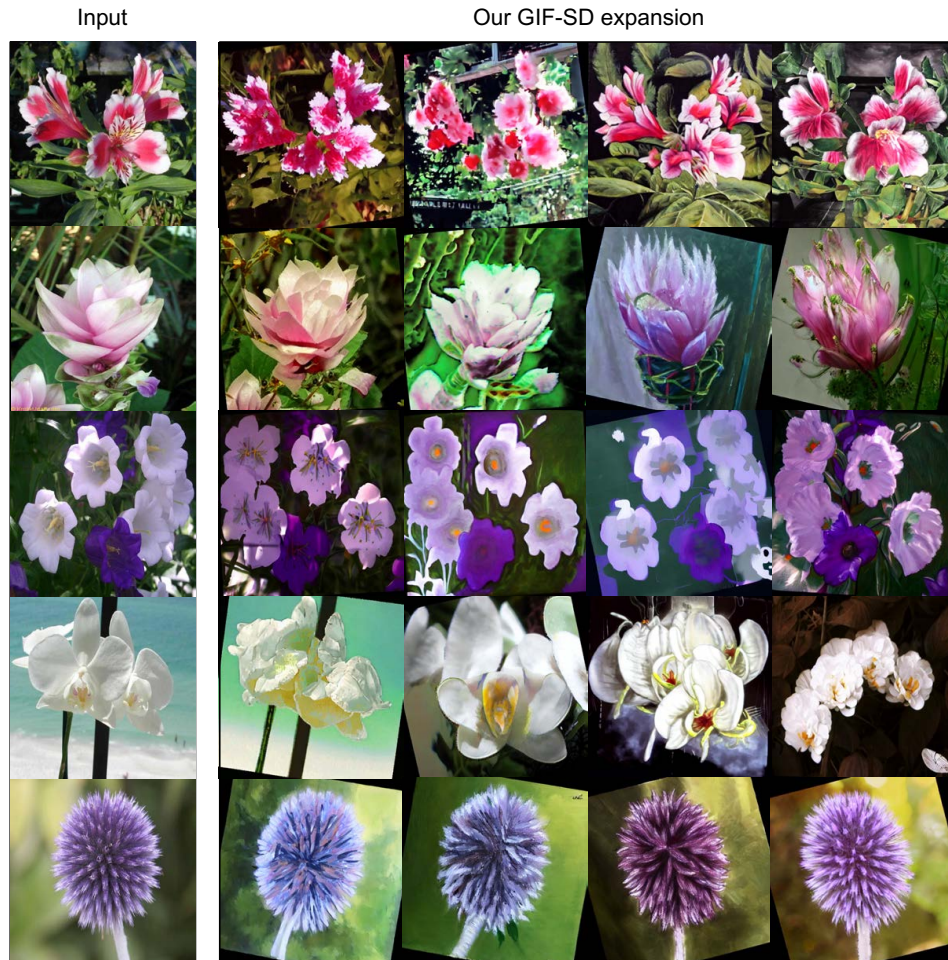

Figure 18: More visualization of the synthetic samples on Flowers by GIF-SD.

### G.3.2 Visualization of the expanded images by GIF-DALLE on Flowers

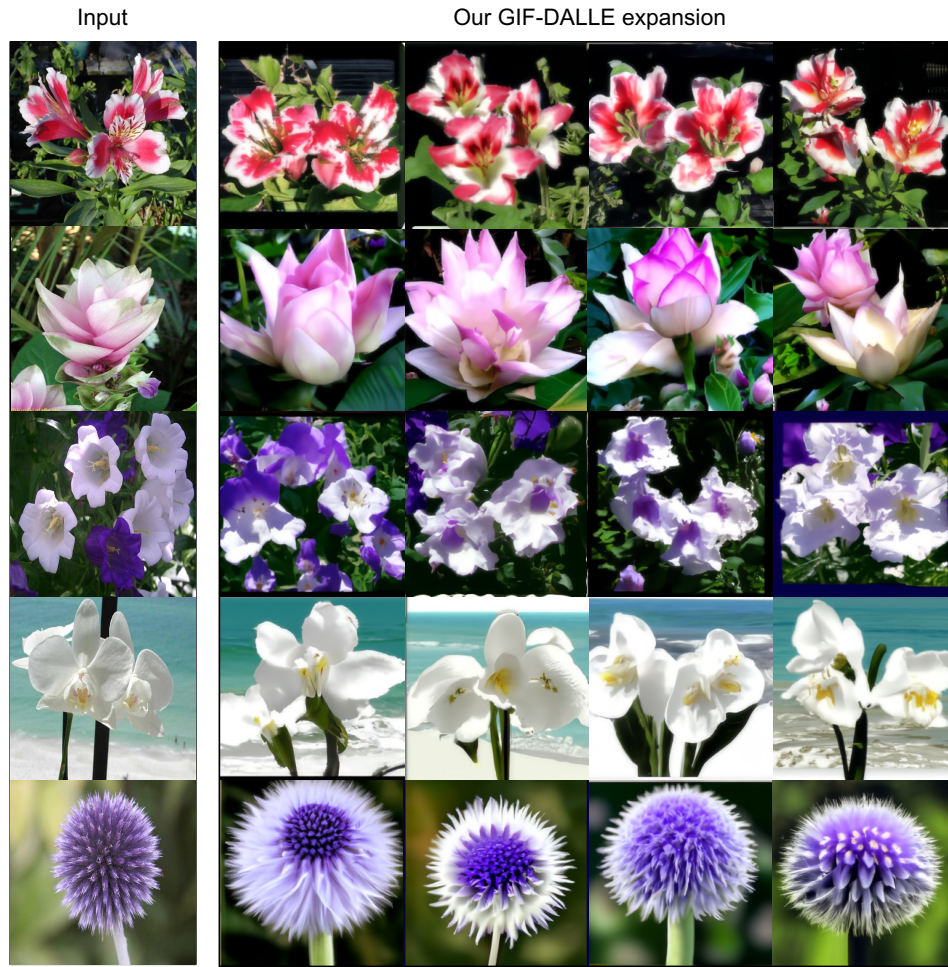

Figure 19: More visualization of the synthetic samples on Flowers by GIF-DALLE.

#### G.4 Visualization of the expanded images on Pets

##### G.4.1 Visualization of the expanded images by GIF-SD on Pets

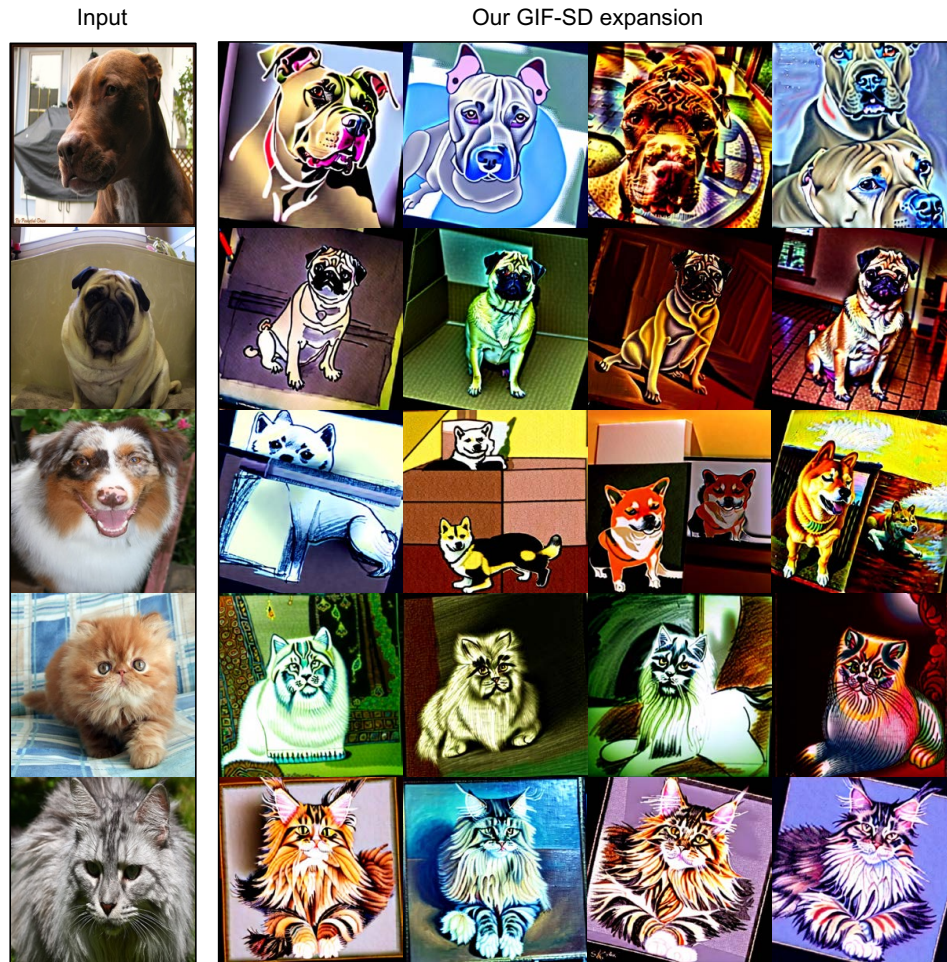

Figure 20: More visualization of the synthetic samples on Pets by GIF-SD.

#### G.4.2 Visualization of the expanded images by GIF-DALLE on Pets

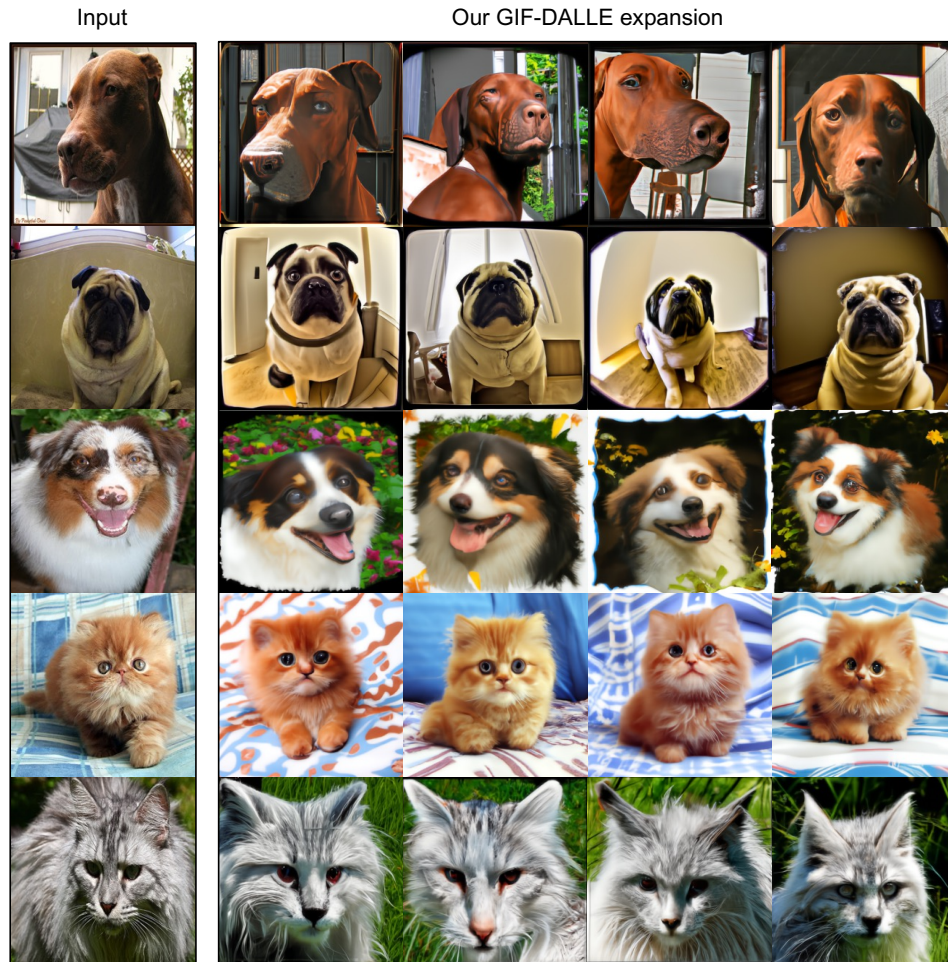

Figure 21: More visualization of the synthetic samples on Pets by GIF-DALLE.

## G.5 Visualization of the expanded images on CIFAR100-Subset

### G.5.1 Visualization of the expanded images by GIF-SD on CIFAR100-Subset

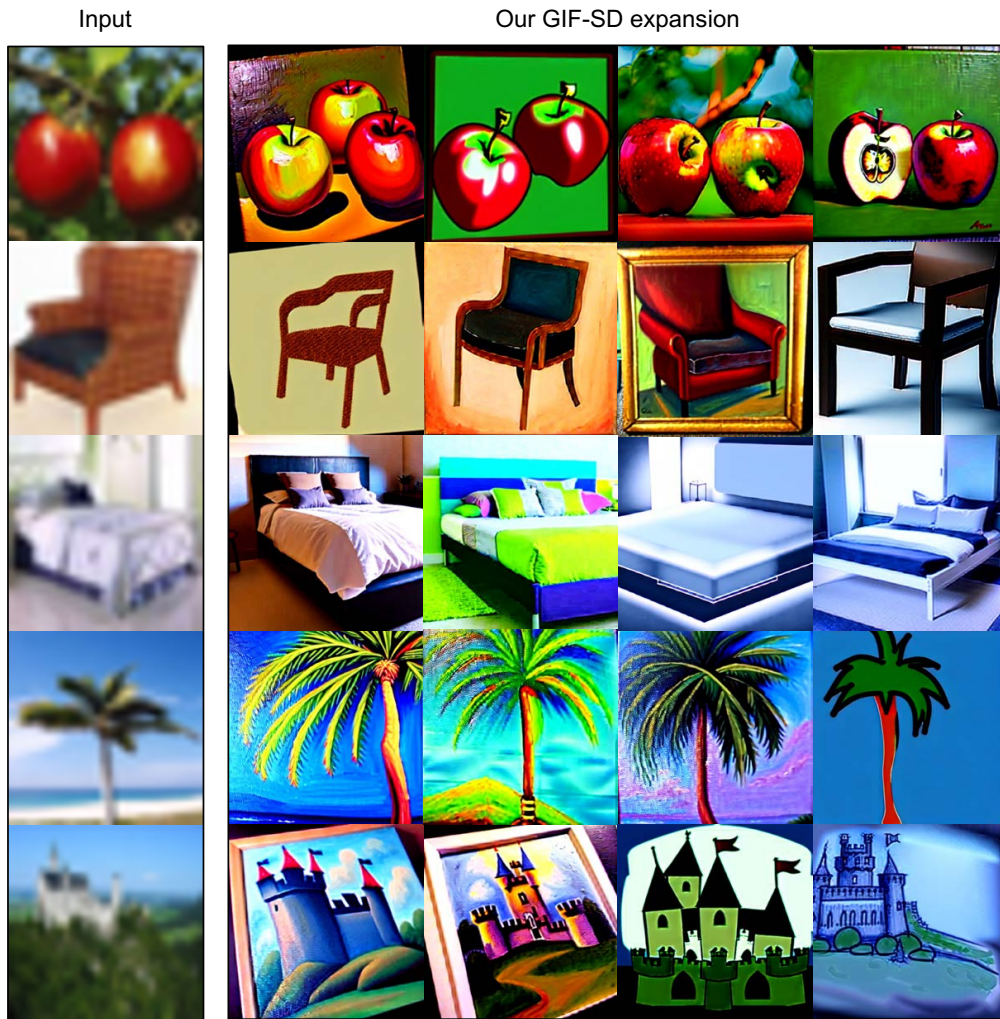

Figure 22: More visualization of the synthetic samples on CIFAR100-Subset by GIF-SD.

### G.5.2 Visualization of the expanded images by GIF-DALLE on CIFAR100-Subset

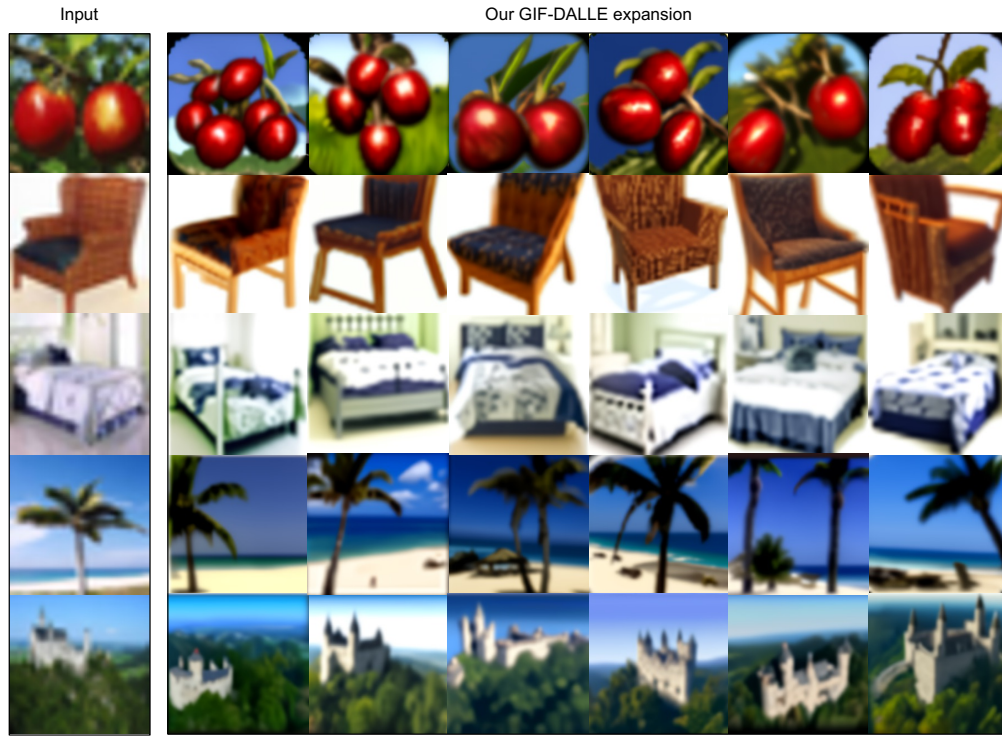

Figure 23: More visualization of the synthetic samples on CIFAR100-Subset by GIF-DALLE. Note that the resolution of the input CIFAR100 images is small (*i.e.*,  $32 \times 32$ ), so their visualization is a little unclear.

## G.6 Visualization of the expanded images on DTD

### G.6.1 Visualization of the expanded images by GIF-SD on DTD

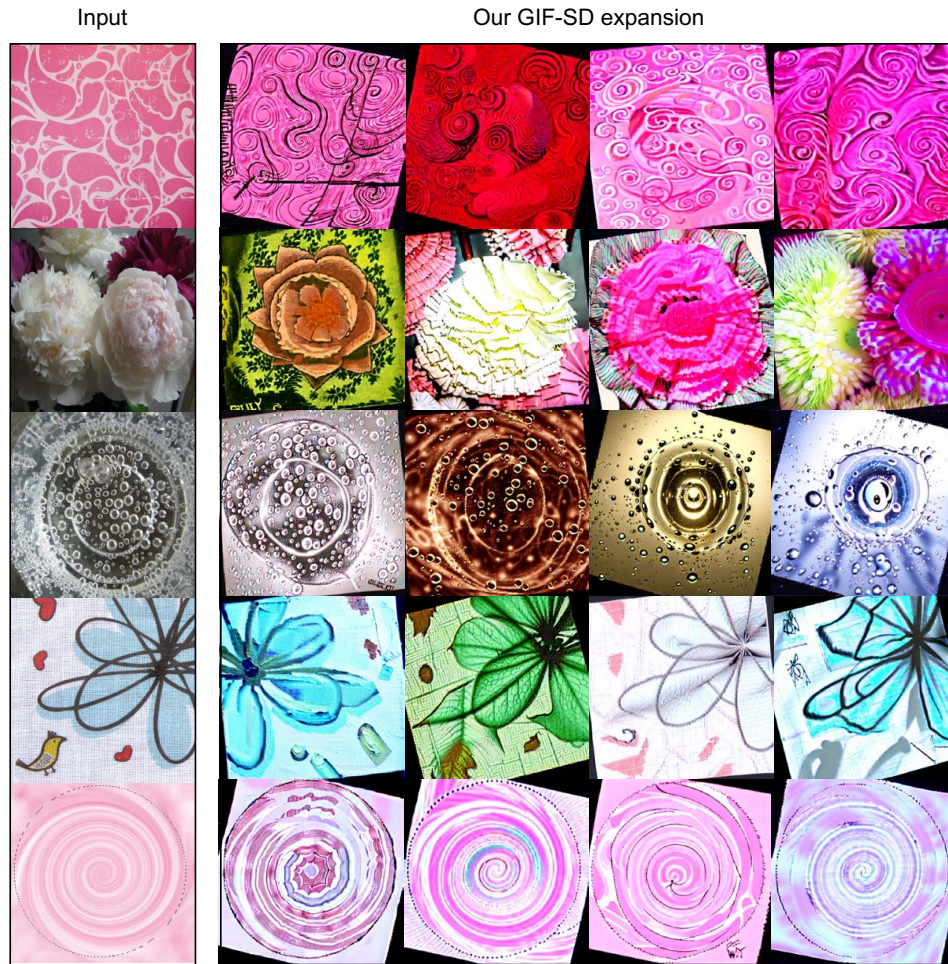

Figure 24: More visualization of the synthetic samples on DTD by GIF-SD.

### G.6.2 Visualization of the expanded images by GIF-DALLE on DTD

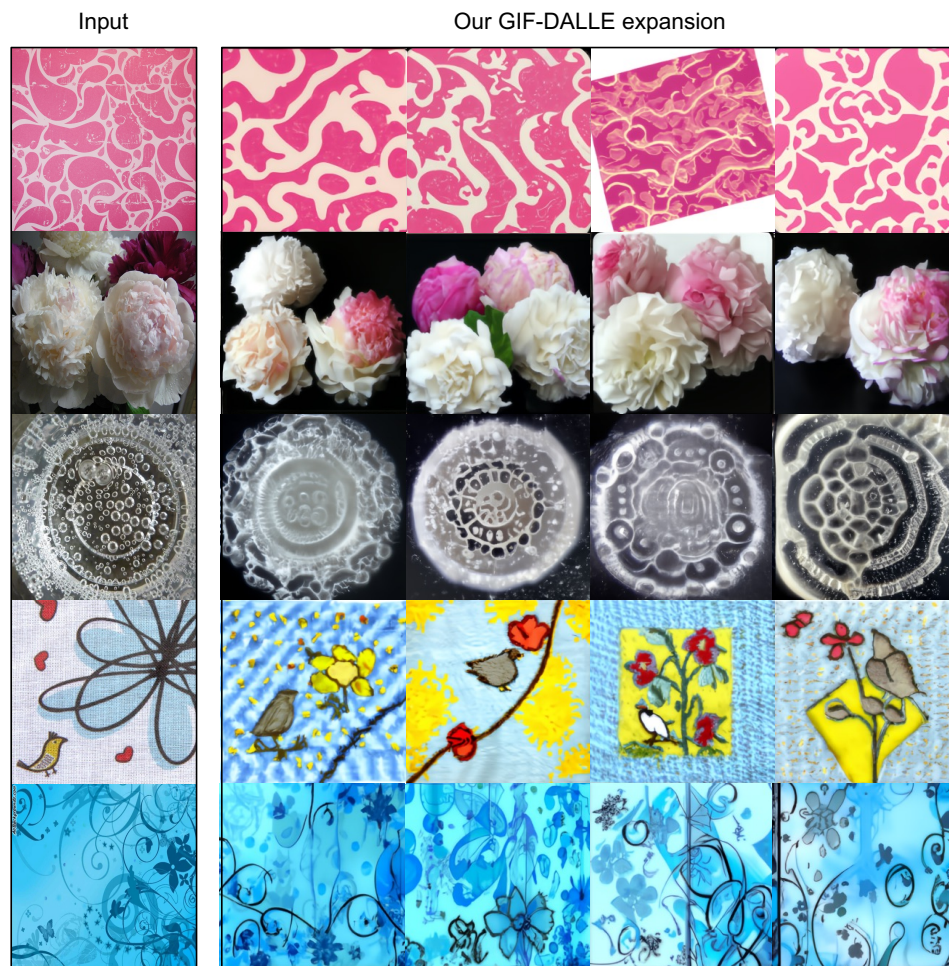

Figure 25: More visualization of the synthetic samples on DTD by GIF-DALLE.

## References

- [1] Walid Al-Dhabyani, Mohammed Gomaa, Hussien Khaled, and Aly Fahmy. Dataset of breast ultrasound images. *Data in Brief*, 28:104863, 2020.
- [2] Shekoofeh Azizi, Simon Kornblith, Chitwan Saharia, Mohammad Norouzi, and David J Fleet. Synthetic data from diffusion models improves imagenet classification. *arXiv preprint arXiv:2304.08466*, 2023.
- [3] Kaidi Cao, Colin Wei, Adrien Gaidon, Nikos Arechiga, and Tengyu Ma. Learning imbalanced datasets with label-distribution-aware margin loss. In *Advances in Neural Information Processing Systems*, 2019.
- [4] George Cazenavette, Tongzhou Wang, Antonio Torralba, Alexei A Efros, and Jun-Yan Zhu. Generalizing dataset distillation via deep generative prior. In *Computer Vision and Pattern Recognition*, 2023.
- [5] Akshay Chawla, Hongxu Yin, Pavlo Molchanov, and Jose Alvarez. Data-free knowledge distillation for object detection. In *Winter Conference on Applications of Computer Vision*, pages 3289–3298, 2021.
- [6] Pengguang Chen, Shu Liu, Hengshuang Zhao, and Jiaya Jia. Gridmask data augmentation. *arXiv preprint arXiv:2001.04086*, 2020.
- [7] Jang Hyun Cho and Bharath Hariharan. On the efficacy of knowledge distillation. In *International Conference on Computer Vision*, pages 4794–4802, 2019.
- [8] Mircea Cimpoi, Subhransu Maji, Iasonas Kokkinos, Sammy Mohamed, and Andrea Vedaldi. Describing textures in the wild. In *Computer Vision and Pattern Recognition*, pages 3606–3613, 2014.
- [9] Ekin D Cubuk, Barret Zoph, Dandelion Mane, Vijay Vasudevan, and Quoc V Le. Autoaugment: Learning augmentation strategies from data. In *Computer Vision and Pattern Recognition*, pages 113–123, 2019.
- [10] Ekin Dogus Cubuk, Barret Zoph, Jon Shlens, and Quoc Le. Randaugment: Practical automated data augmentation with a reduced search space. In *Advances in Neural Information Processing Systems*, volume 33, 2020.
- [11] Gang Dai, Yifan Zhang, Qingfeng Wang, Qing Du, Zhuliang Yu, Zhuoman Liu, and Shuangping Huang. Disentangling writer and character styles for handwriting generation. In *Computer Vision and Pattern Recognition*, pages 5977–5986, 2023.
- [12] Jia Deng, Wei Dong, Richard Socher, Li-Jia Li, Kai Li, and Li Fei-Fei. Imagenet: A large-scale hierarchical image database. In *Computer Vision and Pattern Recognition*, pages 248–255, 2009.
- [13] Terrance DeVries and Graham W Taylor. Improved regularization of convolutional neural networks with cutout. *arXiv preprint arXiv:1708.04552*, 2017.
- [14] Prafulla Dhariwal and Alexander Nichol. Diffusion models beat gans on image synthesis. In *Advances in Neural Information Processing Systems*, volume 34, pages 8780–8794, 2021.
- [15] Patrick Esser, Robin Rombach, and Bjorn Ommer. Taming transformers for high-resolution image synthesis. In *Computer Vision and Pattern Recognition*, pages 12873–12883, 2021.
- [16] Li Fei-Fei, Rob Fergus, and Pietro Perona. Learning generative visual models from few training examples: An incremental bayesian approach tested on 101 object categories. In *Computer Vision and Pattern Recognition Workshop*, 2004.
- [17] Yaroslav Ganin and Victor Lempitsky. Unsupervised domain adaptation by backpropagation. In *International Conference on Machine Learning*, pages 1180–1189, 2015.

- [18] Yunhao Ge, Harkirat Behl, Jiashu Xu, Suriya Gunasekar, Neel Joshi, Yale Song, Xin Wang, Laurent Itti, and Vibhav Vineet. Neural-sim: Learning to generate training data with nerf. In *European Conference on Computer Vision*, 2022.
- [19] Jianping Gou, Baosheng Yu, Stephen J Maybank, and Dacheng Tao. Knowledge distillation: A survey. *International Journal of Computer Vision*, 129(6):1789–1819, 2021.
- [20] Beliz Gunel, Jingfei Du, Alexis Conneau, and Ves Stoyanov. Supervised contrastive learning for pre-trained language model fine-tuning. In *International Conference on Learning Representations*, 2021.
- [21] Kaiming He, Xinlei Chen, Saining Xie, Yanghao Li, Piotr Dollár, and Ross Girshick. Masked autoencoders are scalable vision learners. In *Computer Vision and Pattern Recognition*, pages 16000–16009, 2022.
- [22] Kaiming He, Xiangyu Zhang, Shaoqing Ren, and Jian Sun. Deep residual learning for image recognition. In *Computer Vision and Pattern Recognition*, pages 770–778, 2016.
- [23] Ruifei He, Shuyang Sun, Xin Yu, Chuhui Xue, Wenqing Zhang, Philip Torr, Song Bai, and XIAOJUAN QI. Is synthetic data from generative models ready for image recognition? In *International Conference on Learning Representations*, 2023.
- [24] Dan Hendrycks and Thomas Dietterich. Benchmarking neural network robustness to common corruptions and perturbations. *International Conference on Learning Representations*, 2019.
- [25] Dan Hendrycks, Norman Mu, Ekin Dogus Cubuk, Barret Zoph, Justin Gilmer, and Balaji Lakshminarayanan. Augmix: A simple data processing method to improve robustness and uncertainty. In *International Conference on Learning Representations*, 2019.
- [26] Ralf Herbrich. *Learning kernel classifiers: theory and algorithms*. MIT press, 2001.
- [27] Geoffrey Hinton, Oriol Vinyals, Jeff Dean, et al. Distilling the knowledge in a neural network. *arXiv preprint arXiv:1503.02531*, 2015.
- [28] Jonathan Ho, Ajay Jain, and Pieter Abbeel. Denoising diffusion probabilistic models. In *Advances in Neural Information Processing Systems*, volume 33, pages 6840–6851, 2020.
- [29] Xun Huang and Serge Belongie. Arbitrary style transfer in real-time with adaptive instance normalization. In *International Conference on Computer Vision*, pages 1501–1510, 2017.
- [30] Phillip Isola, Jun-Yan Zhu, Tinghui Zhou, and Alexei A Efros. Image-to-image translation with conditional adversarial networks. In *Computer Vision and Pattern Recognition*, pages 1125–1134, 2017.
- [31] Ren Jiawei, Cunjun Yu, Xiao Ma, Haiyu Zhao, Shuai Yi, et al. Balanced meta-softmax for long-tailed visual recognition. In *Advances in Neural Information Processing Systems*, 2020.
- [32] Jakob Nikolas Kather, Johannes Krisam, Pornpimol Charoentong, Tom Luedde, Esther Herpel, Cleo-Aron Weis, Timo Gaiser, Alexander Marx, Nektarios A Valous, Dyke Ferber, et al. Predicting survival from colorectal cancer histology slides using deep learning: A retrospective multicenter study. *PLoS Medicine*, 16(1):e1002730, 2019.
- [33] Gwanghyun Kim, Taesung Kwon, and Jong Chul Ye. Diffusionclip: Text-guided diffusion models for robust image manipulation. In *Computer Vision and Pattern Recognition*, pages 2426–2435, 2022.
- [34] Diederik P Kingma, Max Welling, et al. An introduction to variational autoencoders. *Foundations and Trends in Machine Learning*, 12(4):307–392, 2019.
- [35] Jonathan Krause, Jia Deng, Michael Stark, and Li Fei-Fei. Collecting a large-scale dataset of fine-grained cars. In *Workshop on Fine-Grained Visual Categorization*, 2013.
- [36] Alex Krizhevsky, Geoffrey Hinton, et al. Learning multiple layers of features from tiny images. *Toronto, ON, Canada*, 2009.

- [37] Pu Li, Xiangyang Li, and Xiang Long. Fencemask: A data augmentation approach for pre-extracted image features. *arXiv preprint arXiv:2006.07877*, 2020.
- [38] Xingjian Li, Haoyi Xiong, et al. Delta: Deep learning transfer using feature map with attention for convolutional networks. In *International Conference on Learning Representations*, 2019.
- [39] Sungbin Lim, Ildoo Kim, Taesup Kim, Chiheon Kim, and Sungwoong Kim. Fast autoaugment. In *Advances in Neural Information Processing Systems*, volume 32, 2019.
- [40] Hongbin Lin, Yifan Zhang, Zhen Qiu, Shuaicheng Niu, Chuang Gan, Yanxia Liu, and Mingkui Tan. Prototype-guided continual adaptation for class-incremental unsupervised domain adaptation. In *European Conference on Computer Vision*, pages 351–368, 2022.
- [41] B Mildenhall, PP Srinivasan, M Tancik, JT Barron, R Ramamoorthi, and R Ng. Nerf: Representing scenes as neural radiance fields for view synthesis. In *European Conference on Computer Vision*, 2020.
- [42] Alex Nichol, Prafulla Dhariwal, Aditya Ramesh, Pranav Shyam, Pamela Mishkin, Bob McGrew, Ilya Sutskever, and Mark Chen. Glide: Towards photorealistic image generation and editing with text-guided diffusion models. In *International Conference on Machine Learning*, 2022.
- [43] Maria-Elena Nilsback and Andrew Zisserman. Automated flower classification over a large number of classes. In *Indian Conference on Computer Vision, Graphics & Image Processing*, 2008.
- [44] Omkar M Parkhi, Andrea Vedaldi, Andrew Zisserman, and CV Jawahar. Cats and dogs. In *Computer Vision and Pattern Recognition*, 2012.
- [45] Or Patashnik, Zongze Wu, Eli Shechtman, Daniel Cohen-Or, and Dani Lischinski. Styleclip: Text-driven manipulation of stylegan imagery. In *International Conference on Computer Vision*, pages 2085–2094, 2021.
- [46] Zhen Qiu, Yifan Zhang, Hongbin Lin, Shuaicheng Niu, Yanxia Liu, Qing Du, and Mingkui Tan. Source-free domain adaptation via avatar prototype generation and adaptation. In *International Joint Conference on Artificial Intelligence*, pages 2921–2927, 2021.
- [47] Alec Radford, Jong Wook Kim, Chris Hallacy, Aditya Ramesh, Gabriel Goh, Sandhini Agarwal, Girish Sastry, Amanda Askell, Pamela Mishkin, Jack Clark, et al. Learning transferable visual models from natural language supervision. In *International Conference on Machine Learning*, pages 8748–8763. PMLR, 2021.
- [48] Maithra Raghu, Chiyuan Zhang, Jon Kleinberg, and Samy Bengio. Transfusion: Understanding transfer learning for medical imaging. *Advances in Neural Information Processing Systems*, 32, 2019.
- [49] Aditya Ramesh, Prafulla Dhariwal, Alex Nichol, Casey Chu, and Mark Chen. Hierarchical text-conditional image generation with clip latents. *arXiv preprint arXiv:2204.06125*, 2022.
- [50] Aditya Ramesh, Mikhail Pavlov, Gabriel Goh, Scott Gray, Chelsea Voss, Alec Radford, Mark Chen, and Ilya Sutskever. Zero-shot text-to-image generation. In *International Conference on Machine Learning*, pages 8821–8831, 2021.
- [51] Tal Ridnik, Emanuel Ben-Baruch, Asaf Noy, and Lihi Zelnik-Manor. Imagenet-21k pretraining for the masses. In *Neural Information Processing Systems Datasets and Benchmarks Track*, 2021.
- [52] Robin Rombach, Andreas Blattmann, Dominik Lorenz, Patrick Esser, and Björn Ommer. High-resolution image synthesis with latent diffusion models. In *Computer Vision and Pattern Recognition*, pages 10684–10695, 2022.
- [53] Nataniel Ruiz, Yuanzhen Li, Varun Jampani, Yael Pritch, Michael Rubinstein, and Kfir Aberman. Dreambooth: Fine tuning text-to-image diffusion models for subject-driven generation. *arXiv preprint arXiv:2208.12242*, 2022.

- [54] Chitwan Saharia, William Chan, Saurabh Saxena, Lala Li, Jay Whang, Emily Denton, Seyed Kamyar Seyed Ghasemipour, Burcu Karagol Ayan, S Sara Mahdavi, Rapha Gontijo Lopes, et al. Photorealistic text-to-image diffusion models with deep language understanding. In *Advances in Neural Information Processing Systems*, 2022.
- [55] Claude Sammut and Geoffrey I Webb. *Encyclopedia of machine learning and data mining*. Springer Publishing Company, Incorporated, 2017.
- [56] Mark Sandler, Andrew Howard, Menglong Zhu, Andrey Zhmoginov, and Liang-Chieh Chen. Mobilenetv2: Inverted residuals and linear bottlenecks. In *Computer Vision and Pattern Recognition*, pages 4510–4520, 2018.
- [57] Mert Bulent Sariyildiz, Kartteek Alahari, Diane Larlus, and Yannis Kalantidis. Fake it till you make it: Learning transferable representations from synthetic imagenet clones. In *Computer Vision and Pattern Recognition*, 2023.
- [58] Christoph Schuhmann, Robert Kaczmarczyk, Aran Komatsuzaki, Aarush Katta, Richard Vencu, Romain Beaumont, Jenia Jitsev, Theo Coombes, and Clayton Mullis. Laion-400m: Open dataset of clip-filtered 400 million image-text pairs. In *NeurIPS Workshop Datacentric AI*, 2021.
- [59] Ozan Sener and Silvio Savarese. Active learning for convolutional neural networks: A core-set approach. In *International Conference on Learning Representations*, 2017.
- [60] Mingjia Shi, Yuhao Zhou, Kai Wang, Huaizheng Zhang, Shudong Huang, Qing Ye, and Jiancheng Lv. Prior: Personalized prior for reactivating the information overlooked in federated learning. In *Neural Information Processing Systems*, 2023.
- [61] Connor Shorten and Taghi M Khoshgoftaar. A survey on image data augmentation for deep learning. *Journal of big data*, 6(1):1–48, 2019.
- [62] Jiaming Song, Chenlin Meng, and Stefano Ermon. Denoising diffusion implicit models. In *International Conference on Learning Representations*, 2020.
- [63] Samuel Stanton, Pavel Izmailov, Polina Kirichenko, Alexander A Alemi, and Andrew G Wilson. Does knowledge distillation really work? In *Advances in Neural Information Processing Systems*, volume 34, pages 6906–6919, 2021.
- [64] Yonglong Tian, Lijie Fan, Phillip Isola, Huiwen Chang, and Dilip Krishnan. Stablerep: Synthetic images from text-to-image models make strong visual representation learners. *arXiv preprint arXiv:2306.00984*, 2023.
- [65] Eric Tzeng, Judy Hoffman, Kate Saenko, and Trevor Darrell. Adversarial discriminative domain adaptation. In *Computer Vision and Pattern Recognition*, pages 7167–7176, 2017.
- [66] Can Wang, Menglei Chai, Mingming He, Dongdong Chen, and Jing Liao. Clip-nerf: Text-and-image driven manipulation of neural radiance fields. In *Computer Vision and Pattern Recognition*, pages 3835–3844, 2022.
- [67] Pei Wang, Yijun Li, Krishna Kumar Singh, Jingwan Lu, and Nuno Vasconcelos. Imagine: Image synthesis by image-guided model inversion. In *Computer Vision and Pattern Recognition*, pages 3681–3690, 2021.
- [68] Tongzhou Wang, Jun-Yan Zhu, Antonio Torralba, and Alexei A Efros. Dataset distillation. *arXiv preprint arXiv:1811.10959*, 2018.
- [69] Weihao Xia, Yulun Zhang, Yujiu Yang, Jing-Hao Xue, Bolei Zhou, and Ming-Hsuan Yang. Gan inversion: A survey. *IEEE Transactions on Pattern Analysis and Machine Intelligence*, 2022.
- [70] Saining Xie, Ross Girshick, Piotr Dollár, Zhuowen Tu, and Kaiming He. Aggregated residual transformations for deep neural networks. In *Computer Vision and Pattern Recognition*, 2017.
- [71] Austin Xu, Mariya I Vasileva, and Arjun Seshadri. Handsoff: Labeled dataset generation with no additional human annotations. In *NeurIPS 2022 Workshop on Synthetic Data for Empowering ML Research*, 2022.

- [72] Haohang Xu, Shuangrui Ding, Xiaopeng Zhang, Hongkai Xiong, and Qi Tian. Masked autoencoders are robust data augmentors. *arXiv preprint arXiv:2206.04846*, 2022.
- [73] Xuanang Xu, Fugen Zhou, Bo Liu, Dongshan Fu, and Xiangzhi Bai. Efficient multiple organ localization in ct image using 3d region proposal network. *IEEE Transactions on Medical Imaging*, 38(8):1885–1898, 2019.
- [74] Beining Yang, Kai Wang, Qingyun Sun, Cheng Ji, Xingcheng Fu, Hao Tang, Yang You, and Jianxin Li. Does graph distillation see like vision dataset counterpart? In *Neural Information Processing Systems*, 2023.
- [75] Jiancheng Yang, Rui Shi, and Bingbing Ni. Medmnist classification decathlon: A lightweight automl benchmark for medical image analysis. In *IEEE International Symposium on Biomedical Imaging*, pages 191–195, 2021.
- [76] Suorong Yang, Weikang Xiao, Mengcheng Zhang, Suhan Guo, Jian Zhao, and Furao Shen. Image data augmentation for deep learning: A survey. *arXiv preprint arXiv:2204.08610*, 2022.
- [77] Hongxu Yin, Pavlo Molchanov, Jose M Alvarez, Zhizhong Li, Arun Mallya, Derek Hoiem, Niraj K Jha, and Jan Kautz. Dreaming to distill: Data-free knowledge transfer via deepinversion. In *Computer Vision and Pattern Recognition*, pages 8715–8724, 2020.
- [78] Alex Yu, Vickie Ye, Matthew Tancik, and Angjoo Kanazawa. pixelnerf: Neural radiance fields from one or few images. In *Computer Vision and Pattern Recognition*, pages 4578–4587, 2021.
- [79] Longhui Yu, Yifan Zhang, Lanqing Hong, Fei Chen, and Zhenguo Li. Dual-curriculum teacher for domain-inconsistent object detection in autonomous driving. In *British Machine Vision Conference*, 2022.
- [80] Sangdoo Yun, Dongyoon Han, Seong Joon Oh, Sanghyuk Chun, Junsuk Choe, and Youngjoon Yoo. Cutmix: Regularization strategy to train strong classifiers with localizable features. In *International Conference on Computer Vision*, pages 6023–6032, 2019.
- [81] Sergey Zagoruyko and Nikos Komodakis. Wide residual networks. In *British Machine Vision Conference*, 2016.
- [82] Manzil Zaheer, Ankit Singh Rawat, Seungyeon Kim, Chong You, Himanshu Jain, Andreas Veit, Rob Fergus, and Sanjiv Kumar. Teacher guided training: An efficient framework for knowledge transfer. *arXiv preprint arXiv:2208.06825*, 2022.
- [83] Hongyi Zhang, Moustapha Cisse, Yann N. Dauphin, and David Lopez-Paz. Mixup: Beyond empirical risk minimization. In *International Conference on Learning Representations*, 2018.
- [84] Linjun Zhang, Zhun Deng, Kenji Kawaguchi, Amirata Ghorbani, and James Zou. How does mixup help with robustness and generalization? In *International Conference on Learning Representations*, 2021.
- [85] Yifan Zhang, Bryan Hooi, Dapeng Hu, Jian Liang, and Jiashi Feng. Unleashing the power of contrastive self-supervised visual models via contrast-regularized fine-tuning. In *Advances in Neural Information Processing Systems*, volume 34, pages 29848–29860, 2021.
- [86] Yifan Zhang, Bryan Hooi, HONG Lanqing, and Jiashi Feng. Self-supervised aggregation of diverse experts for test-agnostic long-tailed recognition. In *Advances in Neural Information Processing Systems*, 2022.
- [87] Yifan Zhang, Bingyi Kang, Bryan Hooi, Shuicheng Yan, and Jiashi Feng. Deep long-tailed learning: A survey. *IEEE Transactions on Pattern Analysis and Machine Intelligence*, 2023.
- [88] Yifan Zhang, Ying Wei, Qingyao Wu, Peilin Zhao, Shuaicheng Niu, Junzhou Huang, and Mingkui Tan. Collaborative unsupervised domain adaptation for medical image diagnosis. *IEEE Transactions on Image Processing*, 29:7834–7844, 2020.
- [89] Bo Zhao and Hakan Bilen. Dataset condensation with differentiable siamese augmentation. In *International Conference on Machine Learning*, pages 12674–12685, 2021.

- [90] Bo Zhao and Hakan Bilen. Synthesizing informative training samples with gan. *arXiv preprint arXiv:2204.07513*, 2022.
- [91] Bo Zhao, Konda Reddy Mopuri, and Hakan Bilen. Dataset condensation with gradient matching. In *International Conference on Learning Representations*, 2021.
- [92] Zhun Zhong, Liang Zheng, Guoliang Kang, Shaozi Li, and Yi Yang. Random erasing data augmentation. In *AAAI Conference on Artificial Intelligence*, 2020.
- [93] Daquan Zhou, Kai Wang, Jianyang Gu, Xiangyu Peng, Dongze Lian, Yifan Zhang, Yang You, and Jiashi Feng. Dataset quantization. In *International Conference on Computer Vision*, pages 17205–17216, 2023.
- [94] Yongchao Zhou, Hshmat Sahak, and Jimmy Ba. Training on thin air: Improve image classification with generated data. *arXiv preprint arXiv:2305.15316*, 2023.
- [95] Jiapeng Zhu, Yujun Shen, Deli Zhao, and Bolei Zhou. In-domain gan inversion for real image editing. In *European Conference on Computer Vision*, pages 592–608, 2020.
